# Supplementary material for: Partial RAG deficiency in humans induces dysregulated peripheral lymphocyte development and humoral tolerance defect with accumulation of T-bet+ B cells
Source: PubMed Central journal article supplement (PMC9355881; doi:10.1038/s41590-022-01271-6), 2022-07-28
Supplement: 41590_2022_1271_MOESM5_ESM.pdf [file 41590_2022_1271_MOESM5_ESM.pdf]

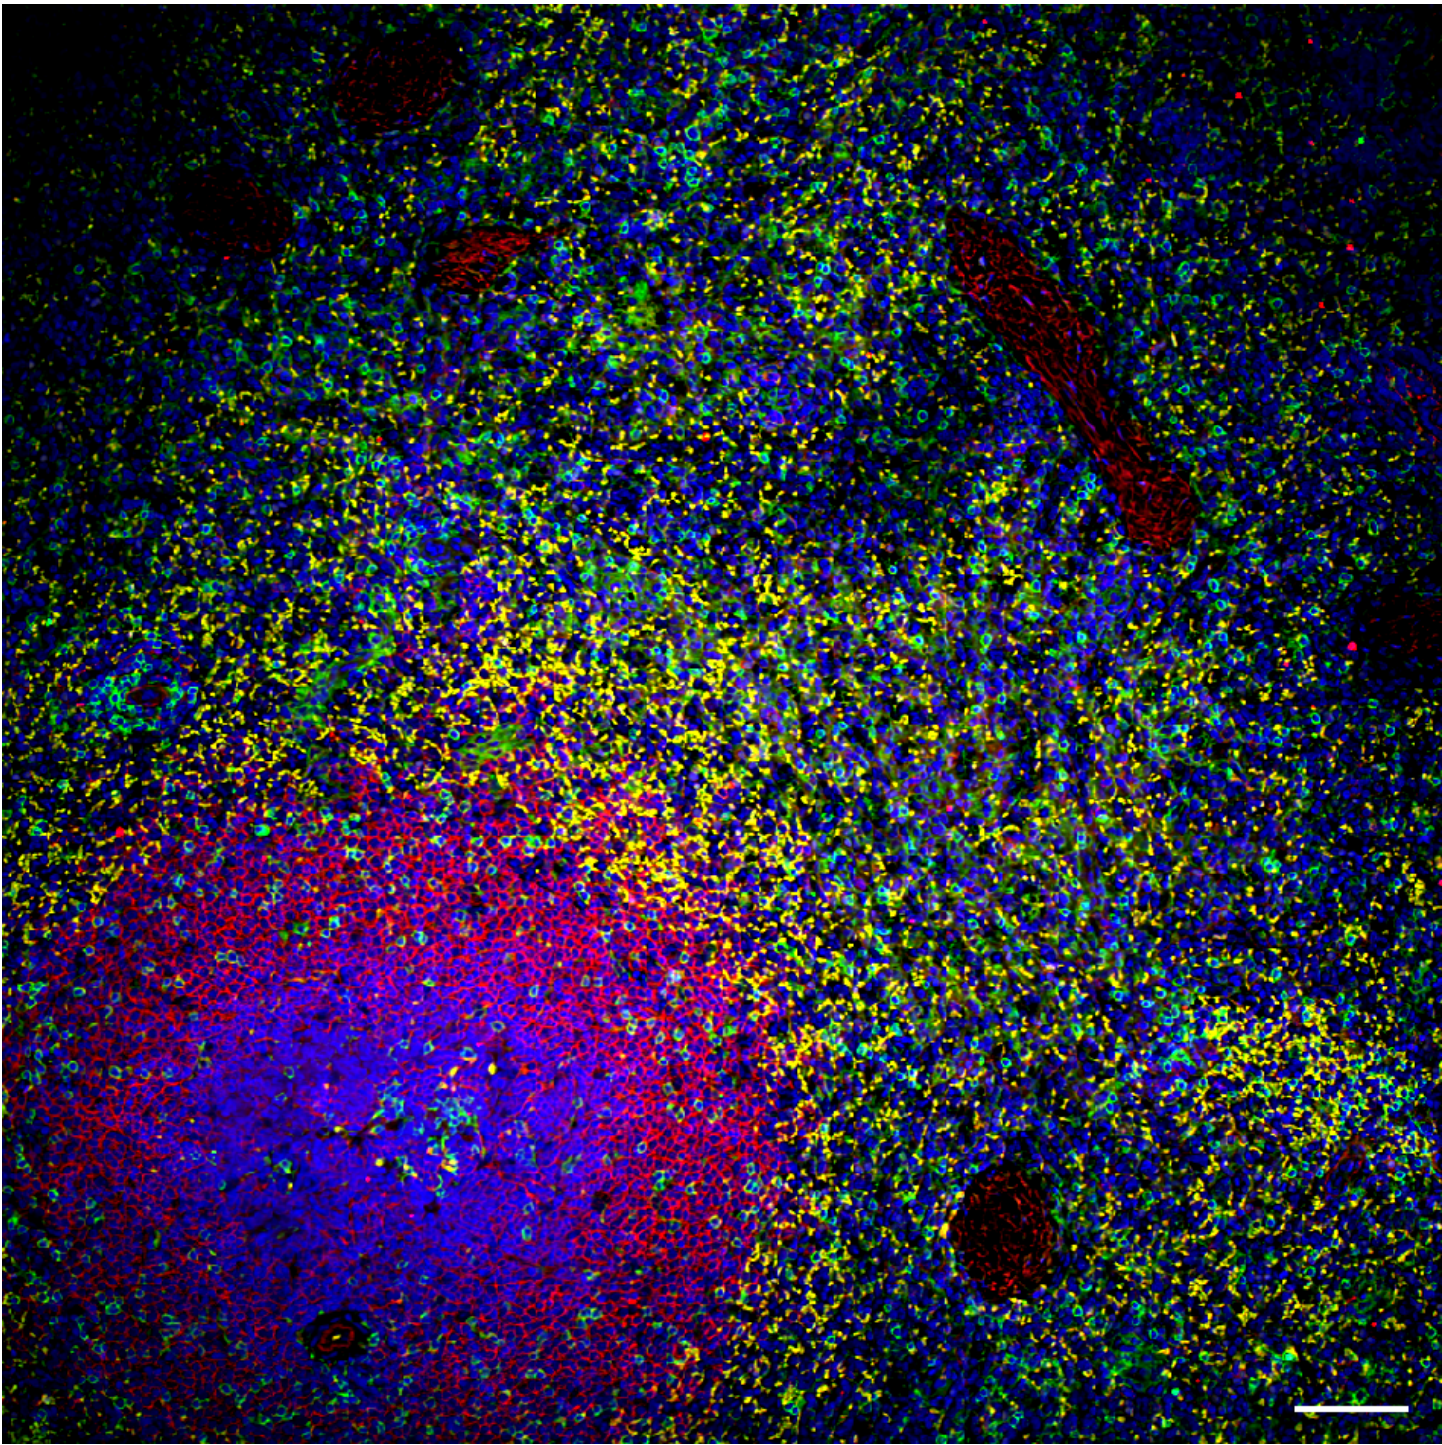

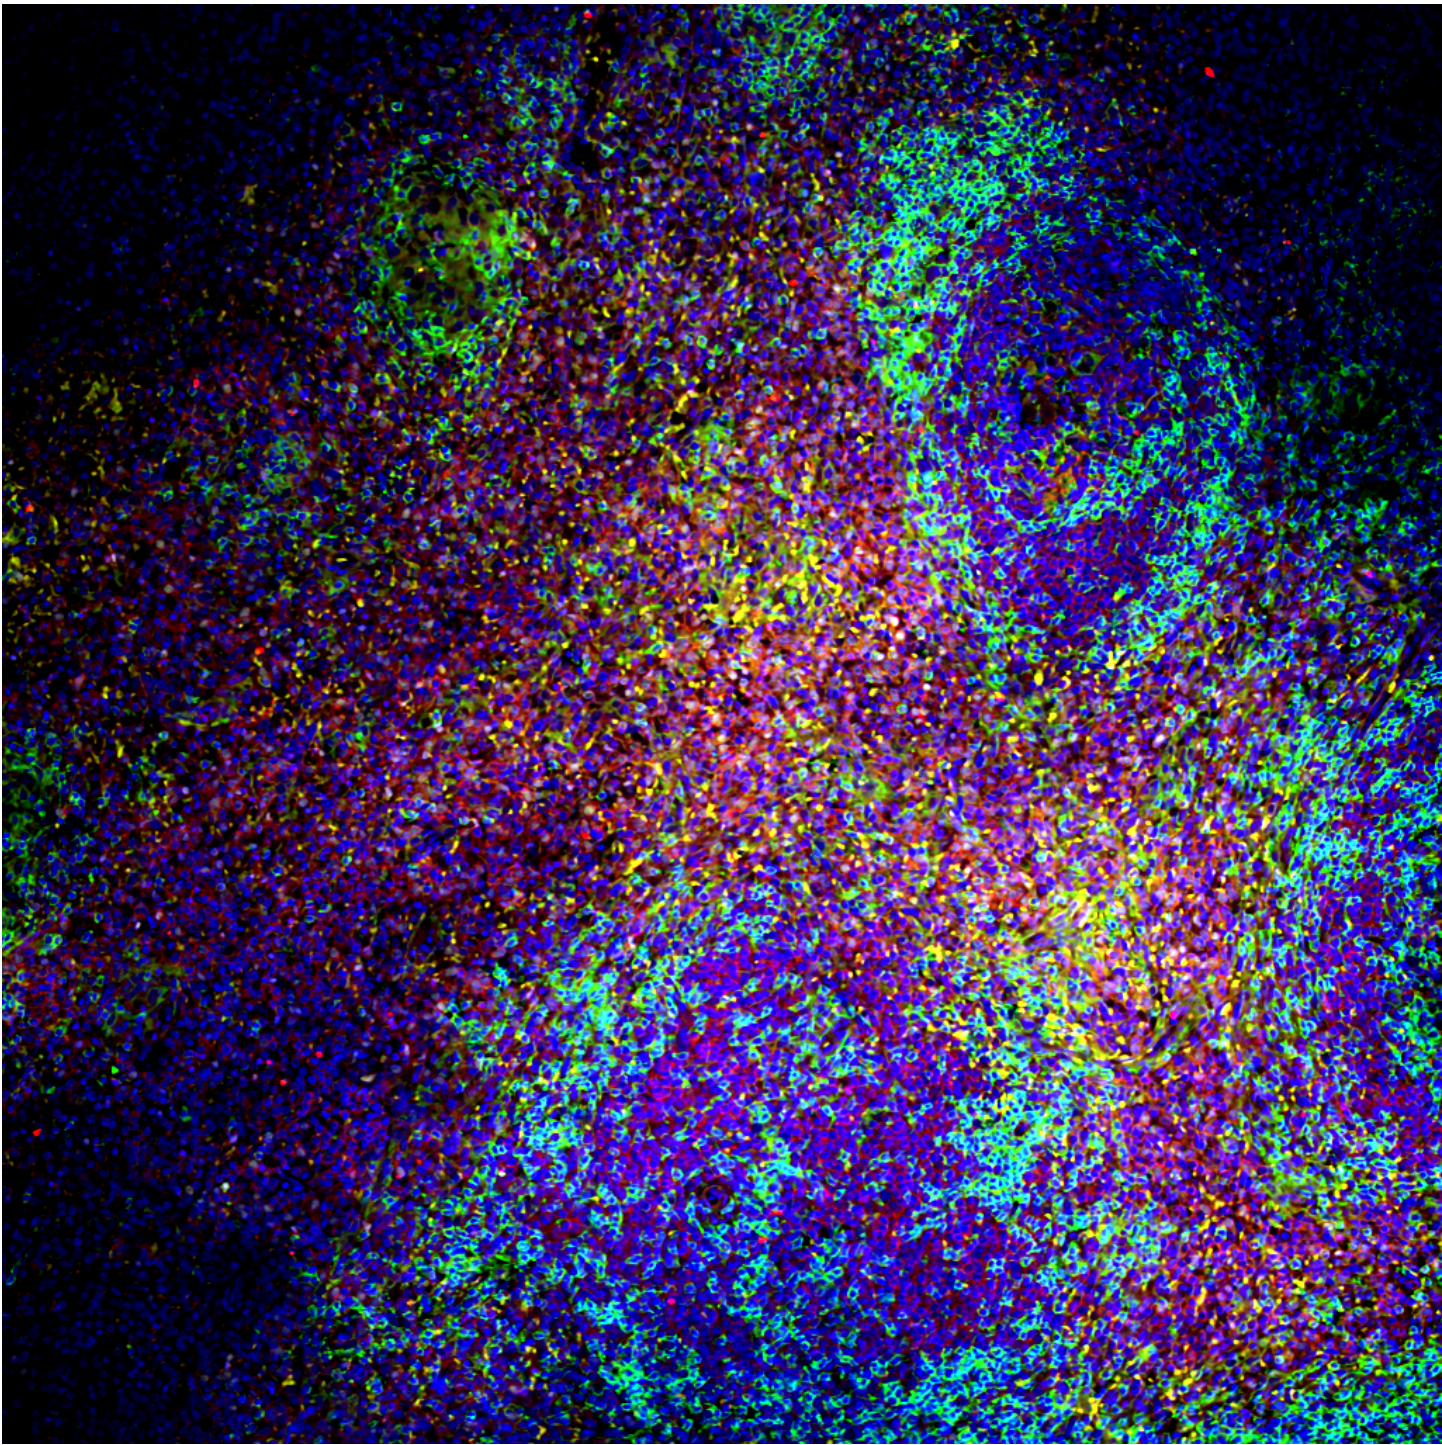

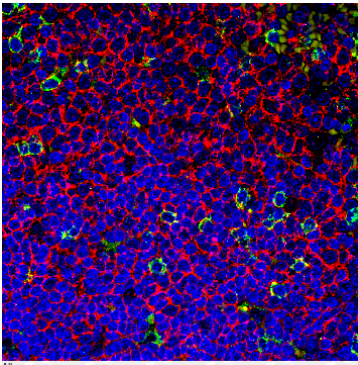

All

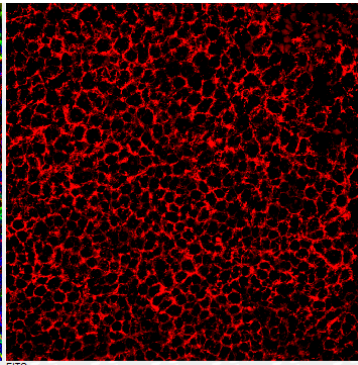

FITC

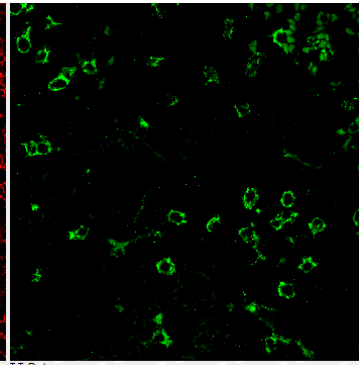

T-irRed

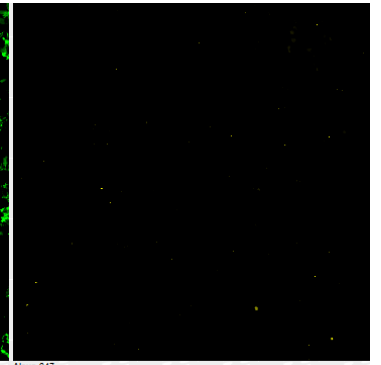

Alexa 647

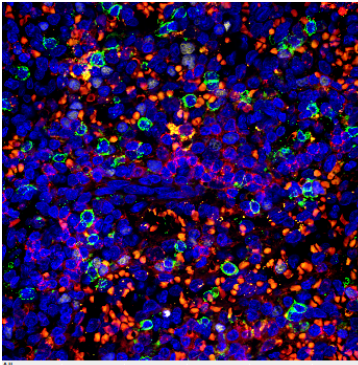

All

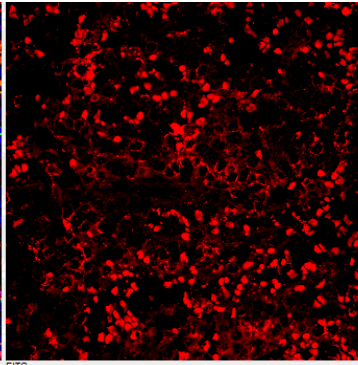

FITC

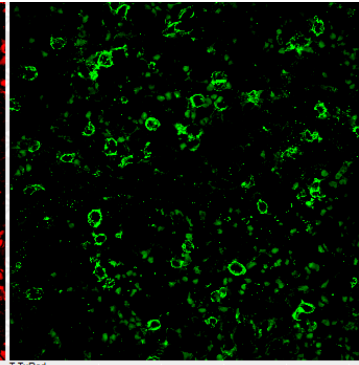

T-ixRed

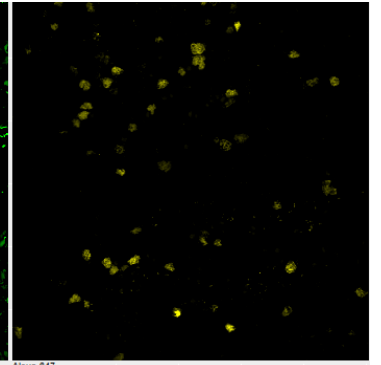

Alexa 647

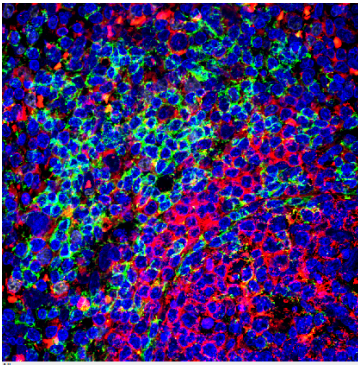

All

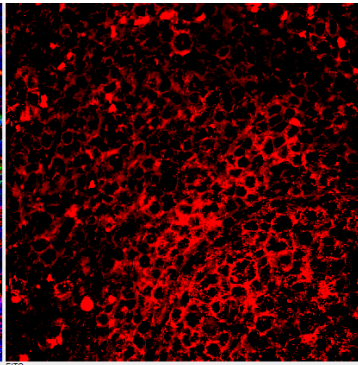

FITC

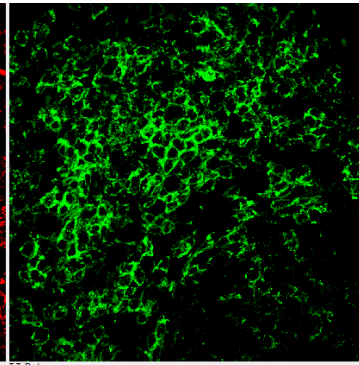

T-10Red

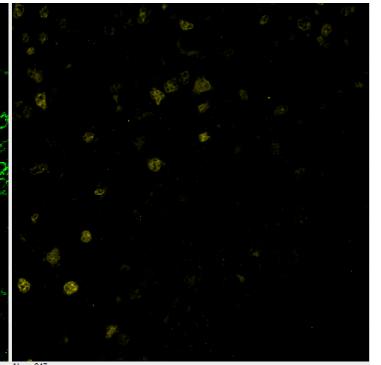

Alexa 547

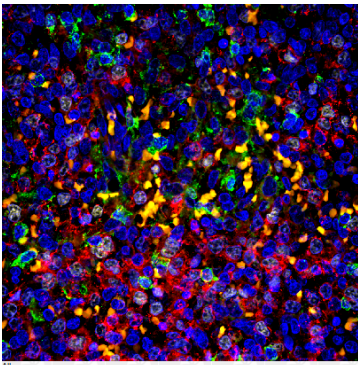

All

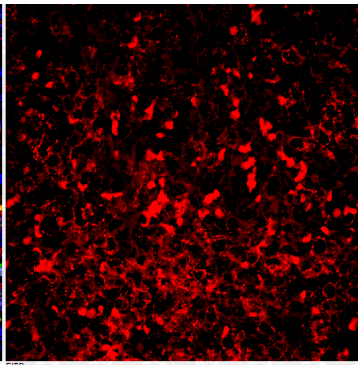

FITC

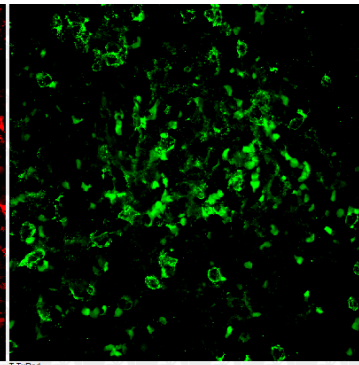

T-720Red

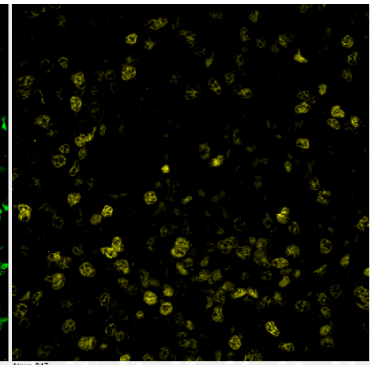

Alexa 547

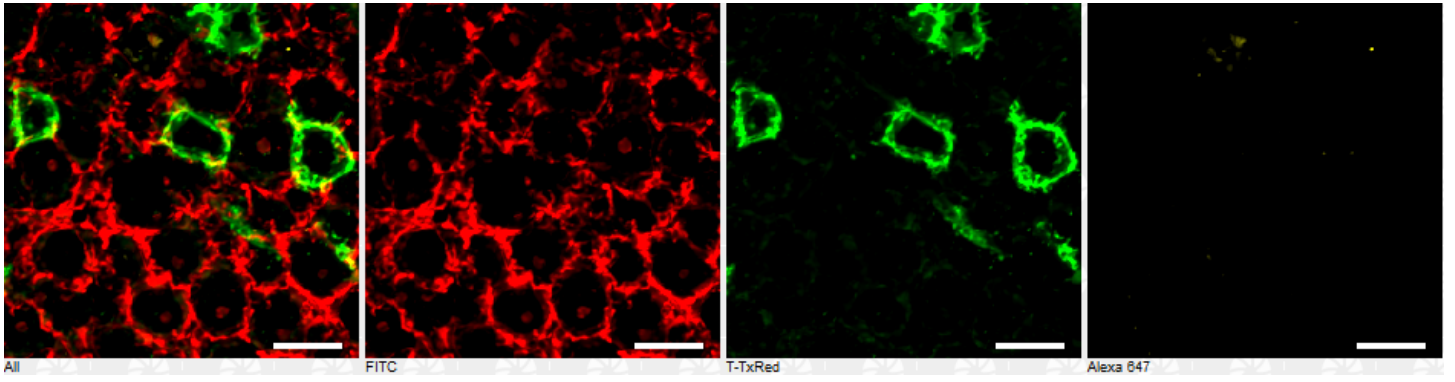

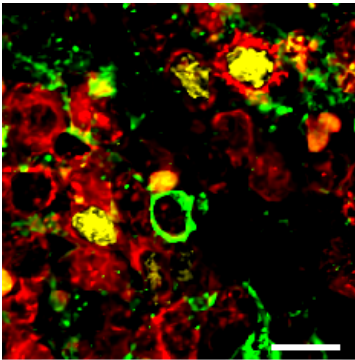

All

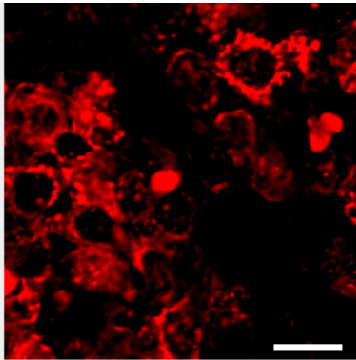

FITC

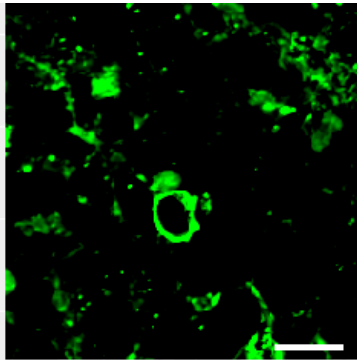

T-TxRed

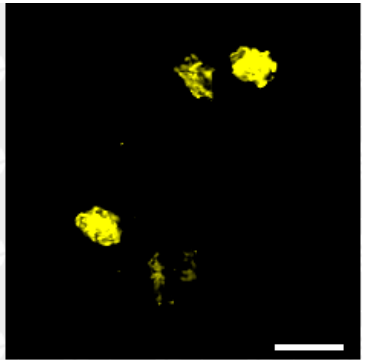

Alexa 647



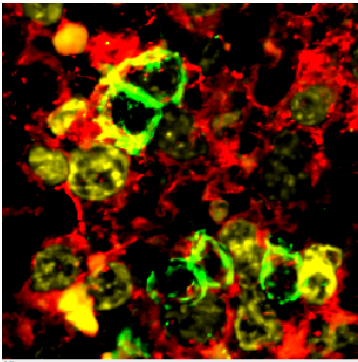

All

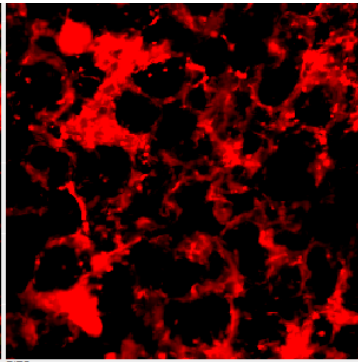

FITC

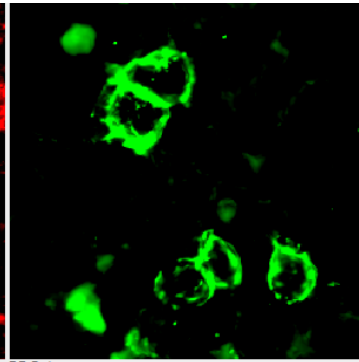

T-DxRed

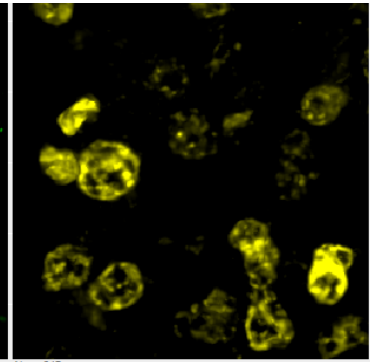

Alexa 647

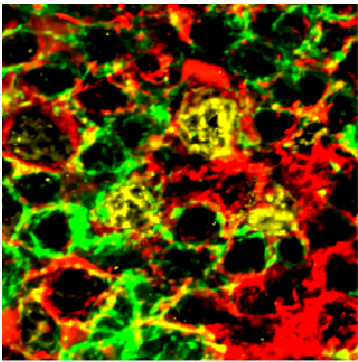

All

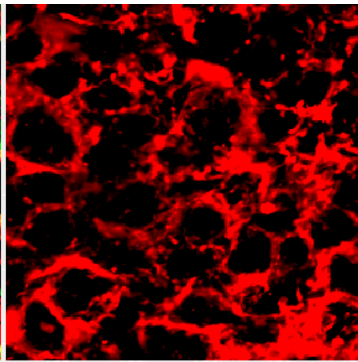

FITC

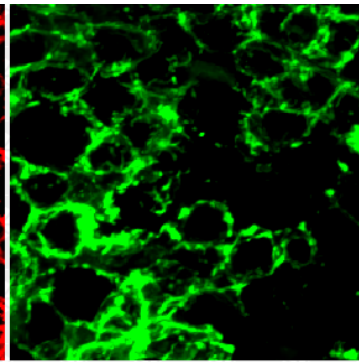

T-DxRed

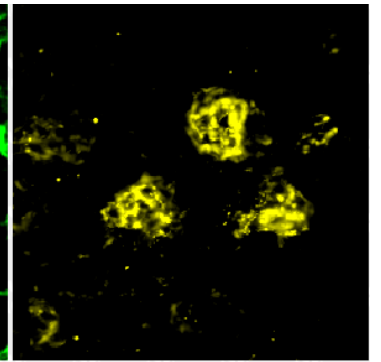

Alexa 647
