# Supplementary material for: Partial RAG deficiency in humans induces dysregulated peripheral lymphocyte development and humoral tolerance defect with accumulation of T-bet+ B cells
Source: PubMed Central journal article supplement (PMC9355881; doi:10.1038/s41590-022-01271-6), 2022-07-28

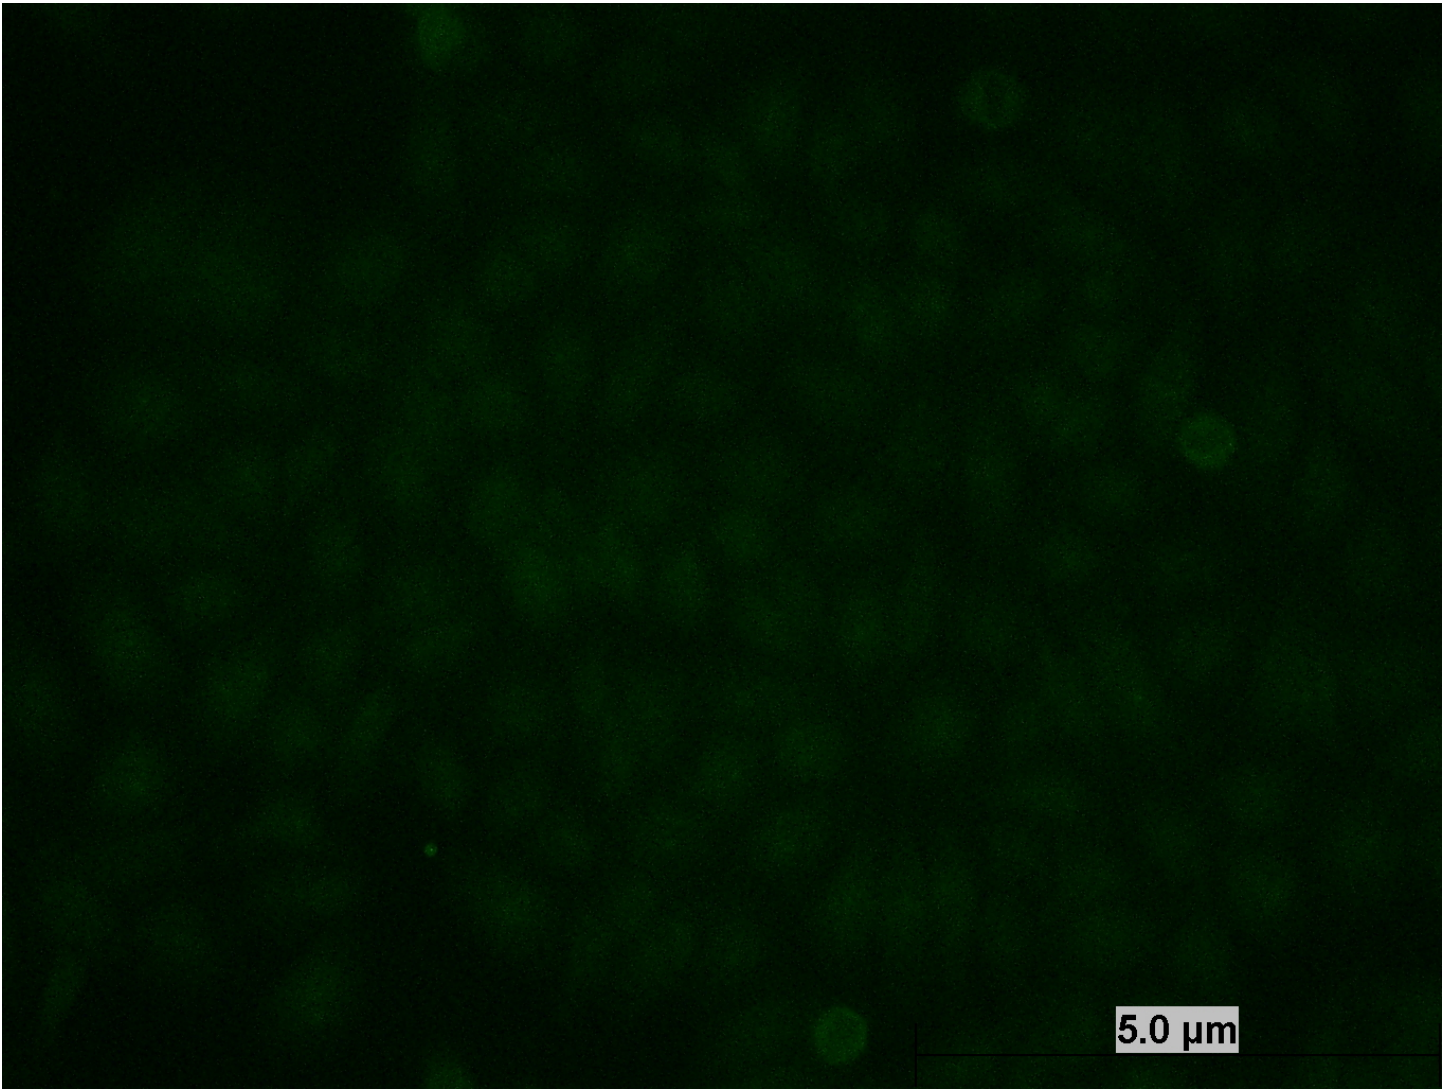

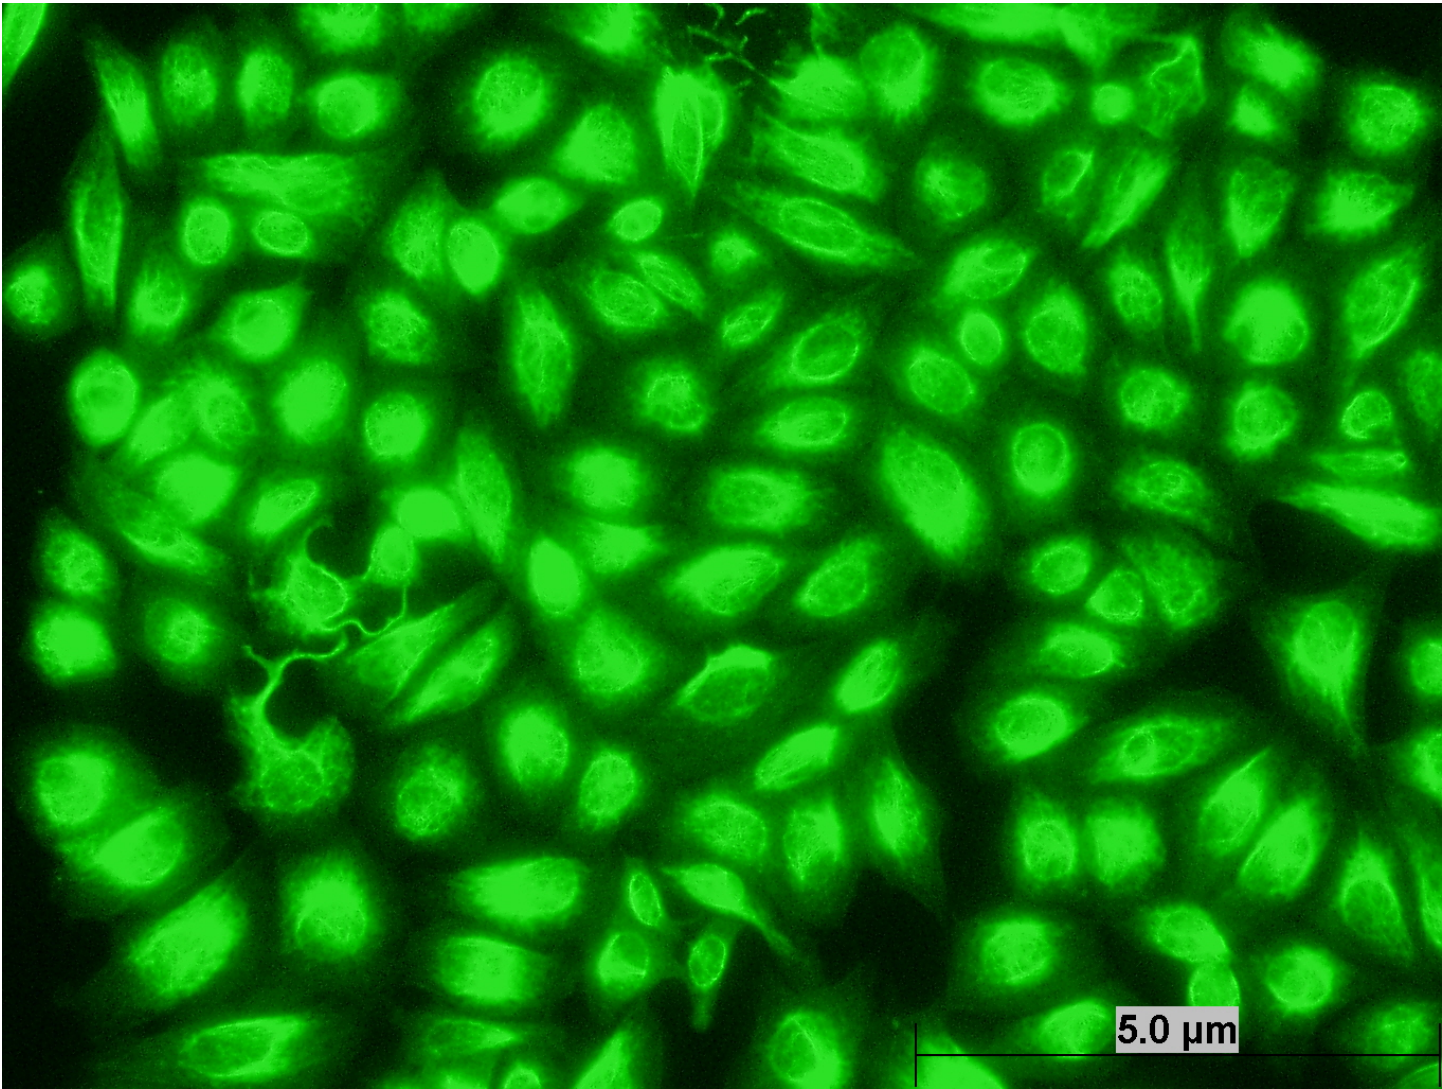

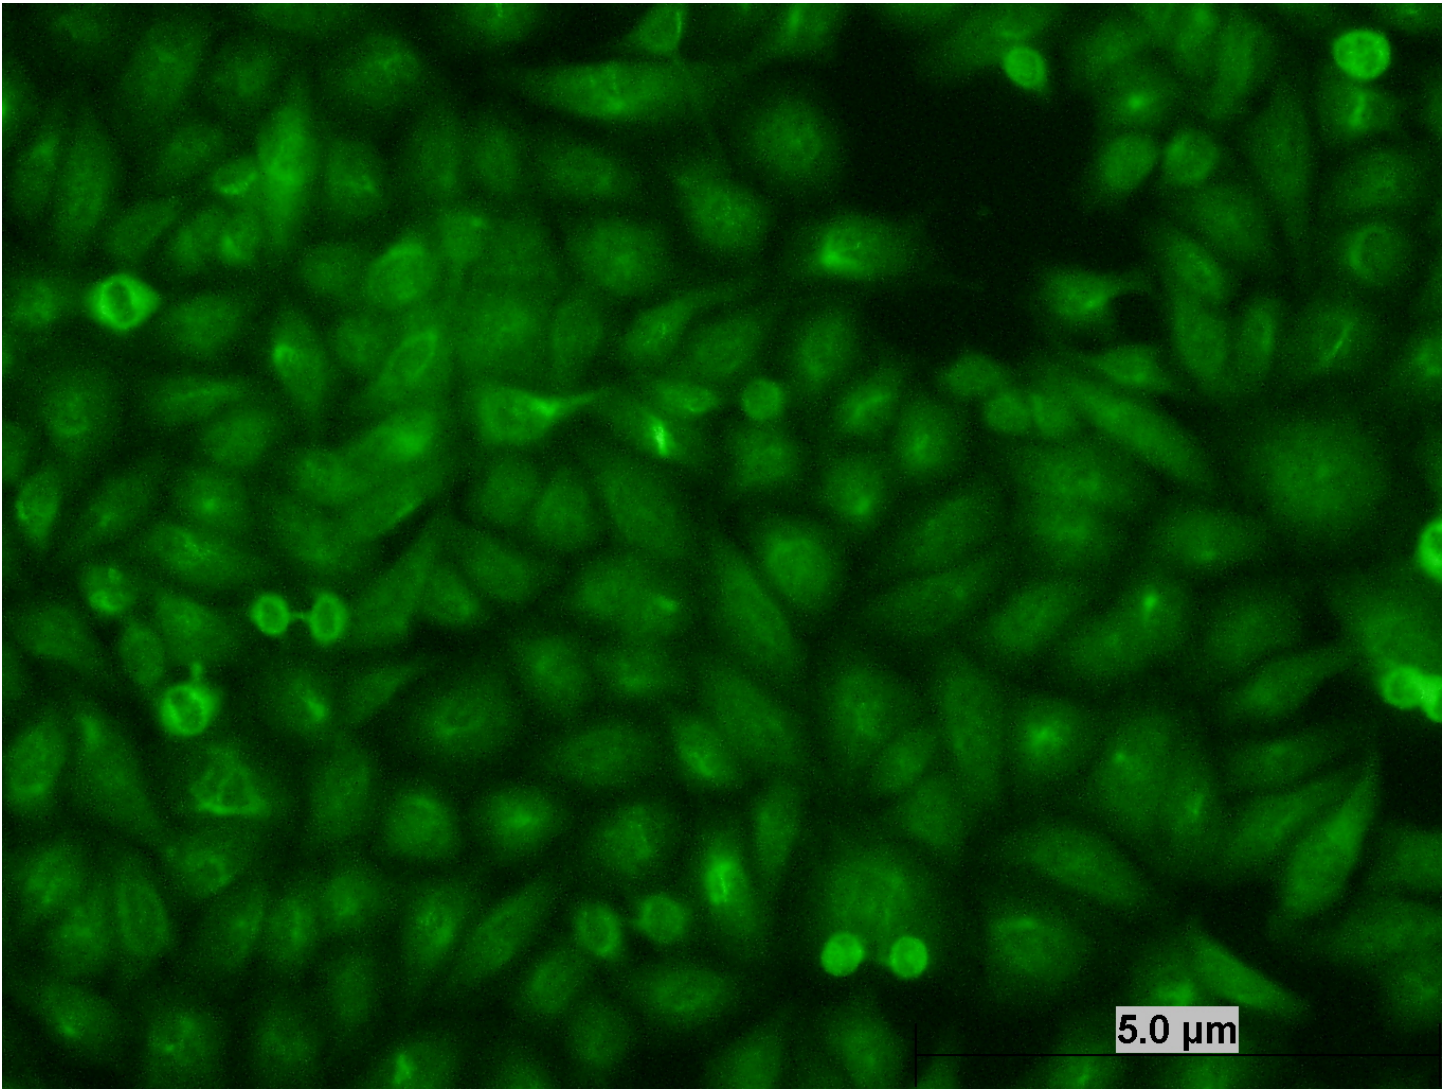

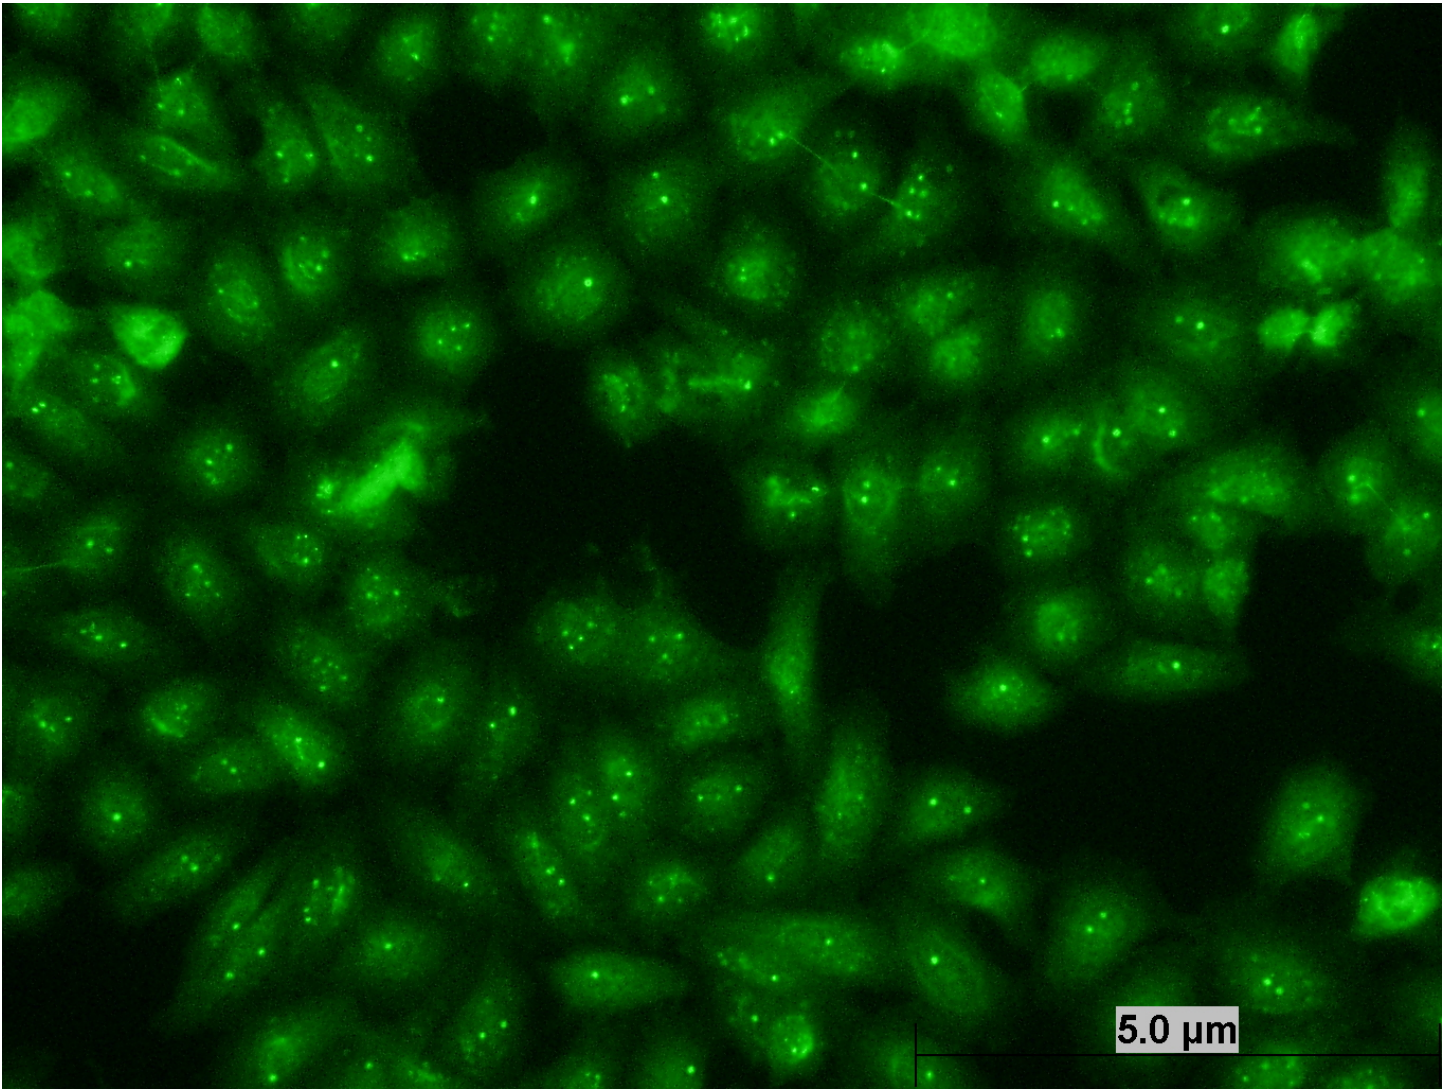

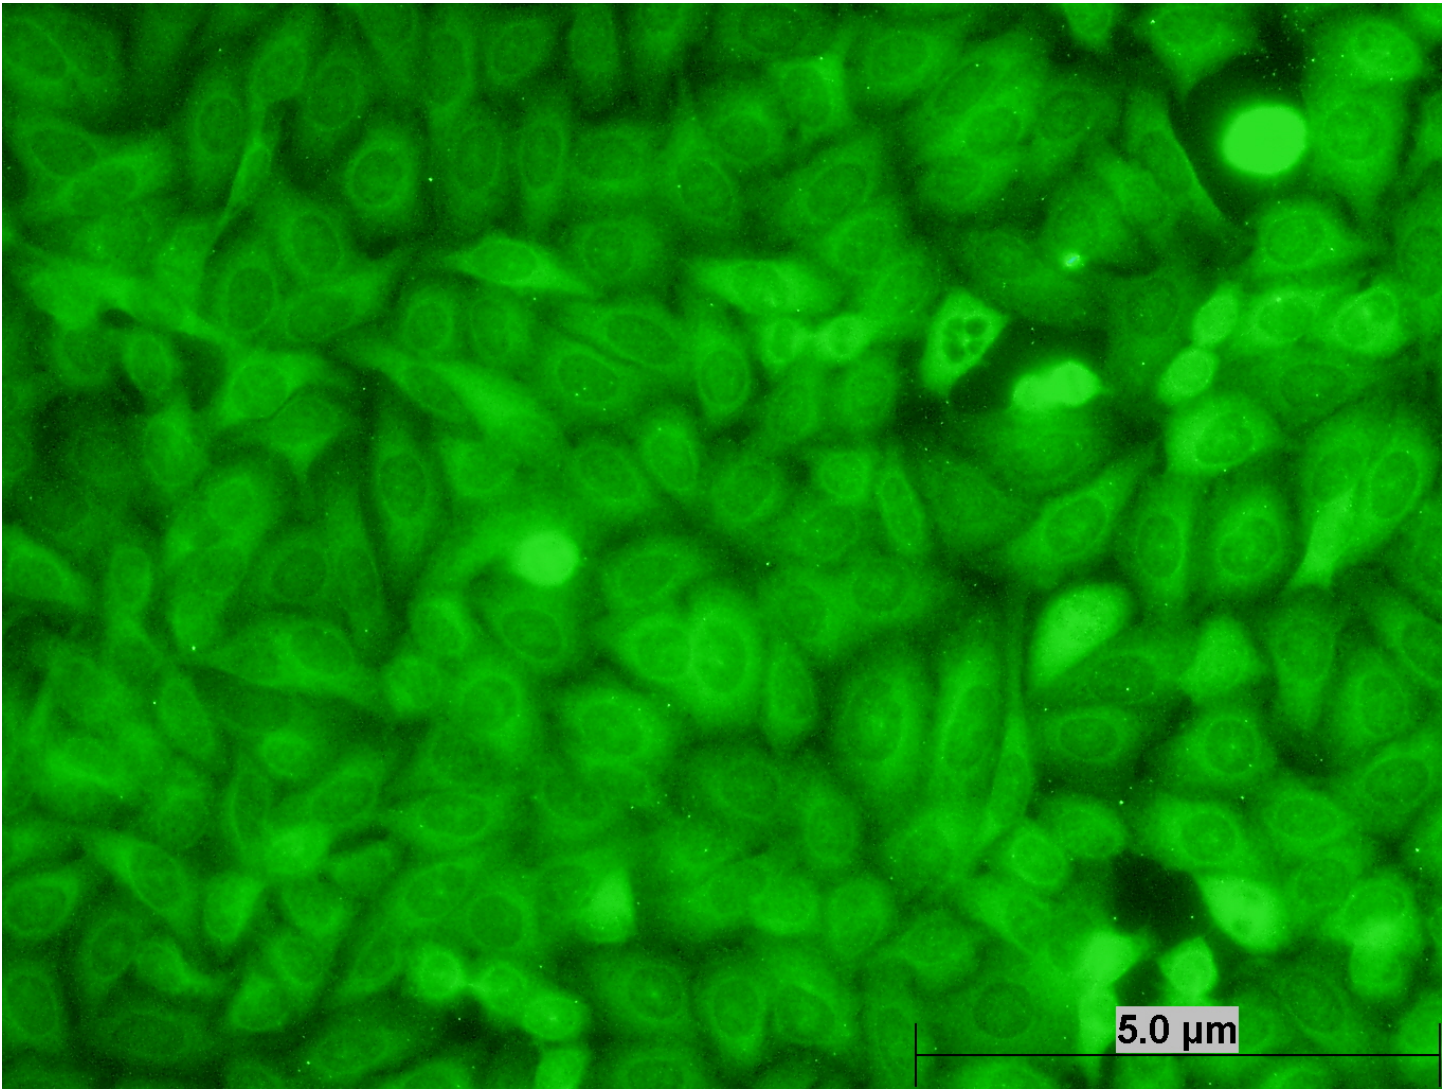

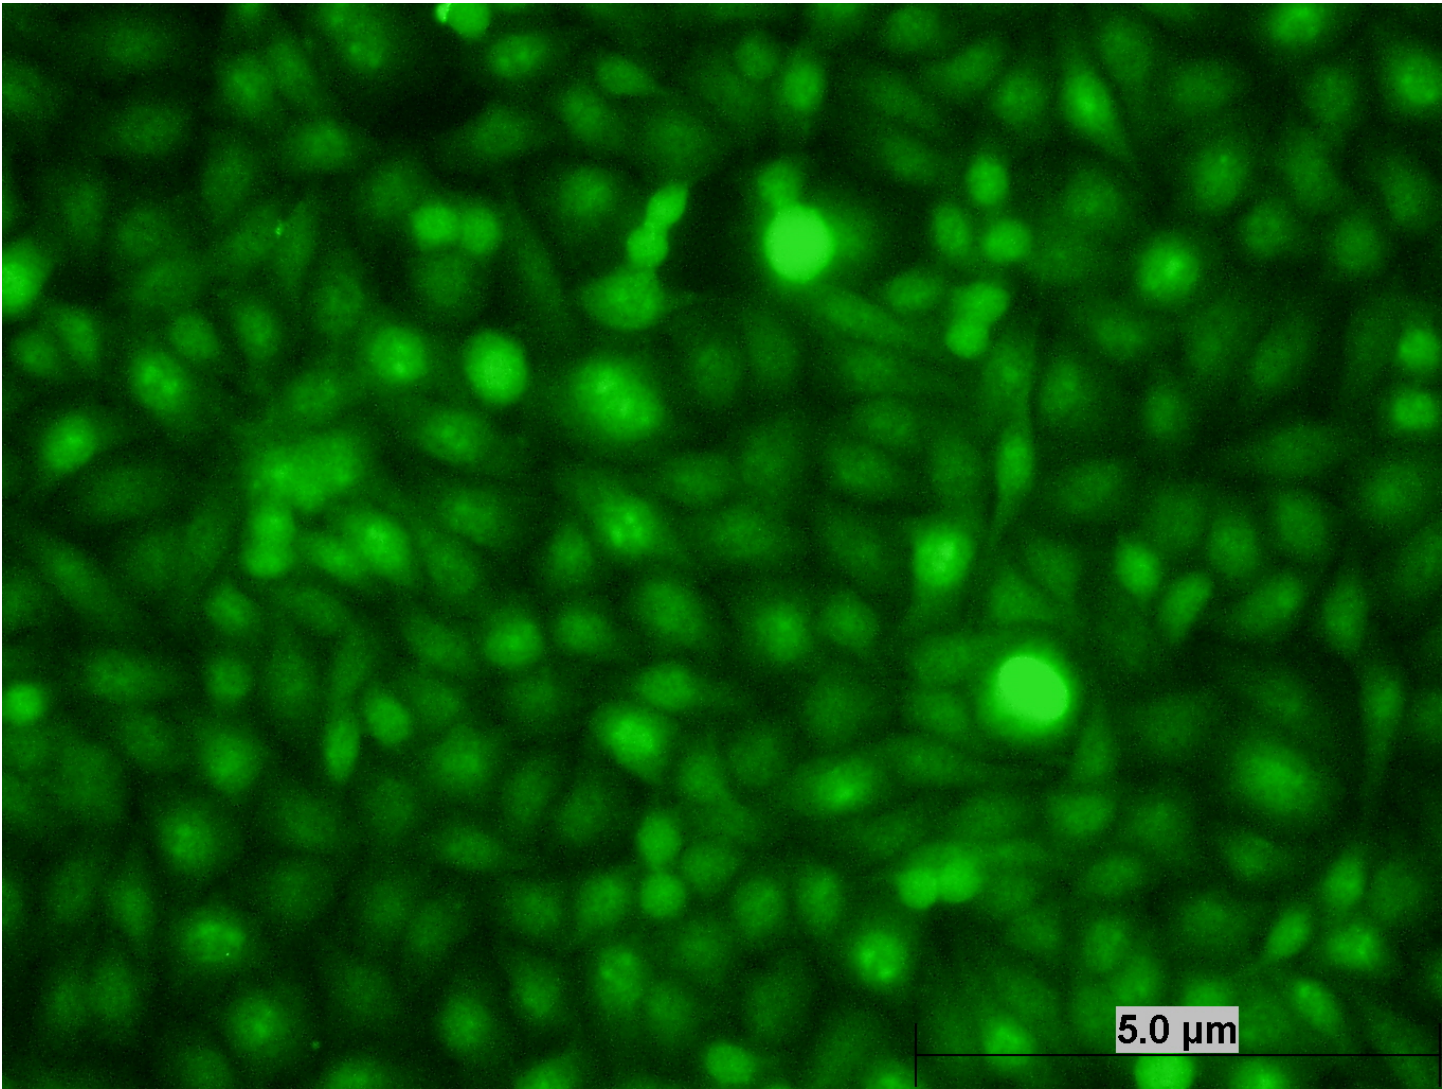

Supplement: 41590_2022_1271_MOESM8_ESM.pdf [file 41590_2022_1271_MOESM8_ESM.pdf]
