# Supplementary material for: Partial RAG deficiency in humans induces dysregulated peripheral lymphocyte development and humoral tolerance defect with accumulation of T-bet+ B cells
Source: PubMed Central journal article supplement (PMC9355881; doi:10.1038/s41590-022-01271-6), 2022-07-28
Supplement: 41590_2022_1271_MOESM18_ESM.pdf [file 41590_2022_1271_MOESM18_ESM.pdf]

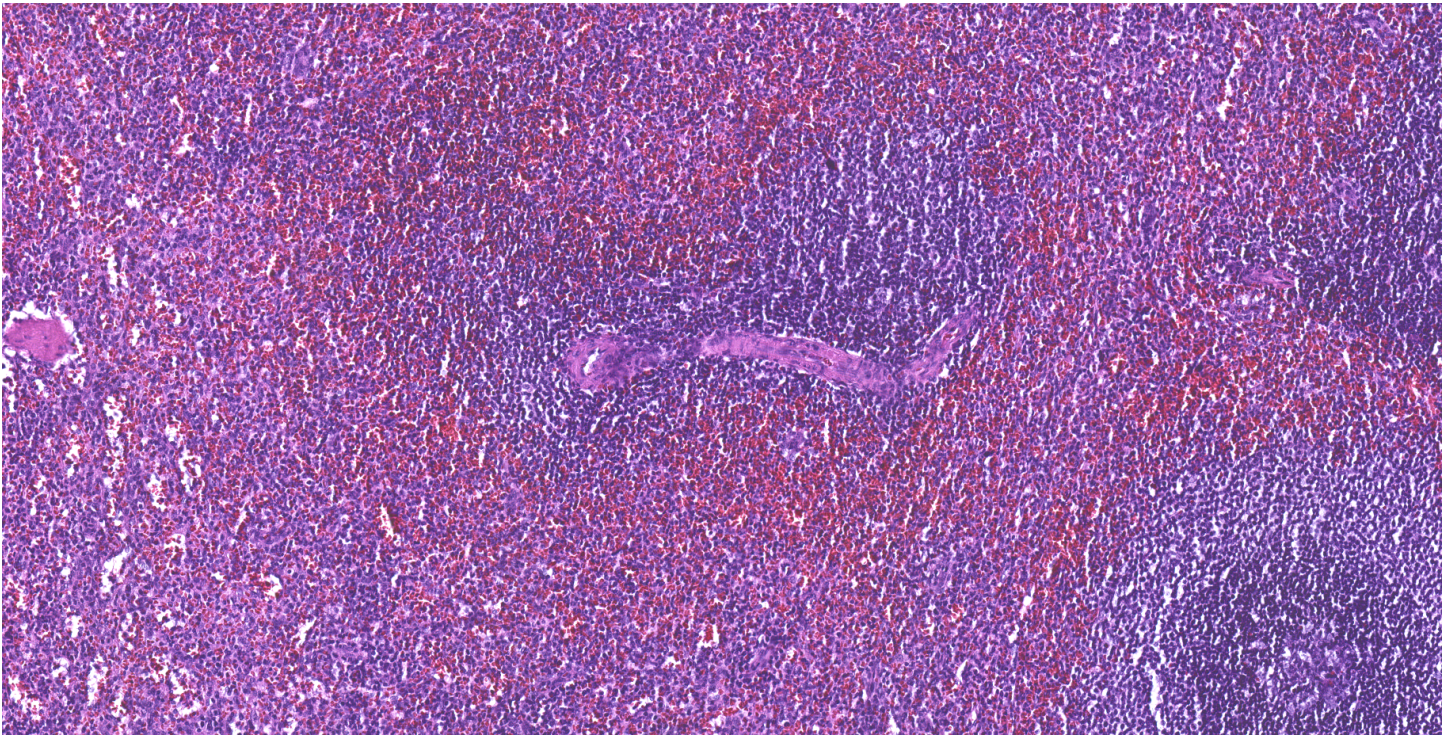

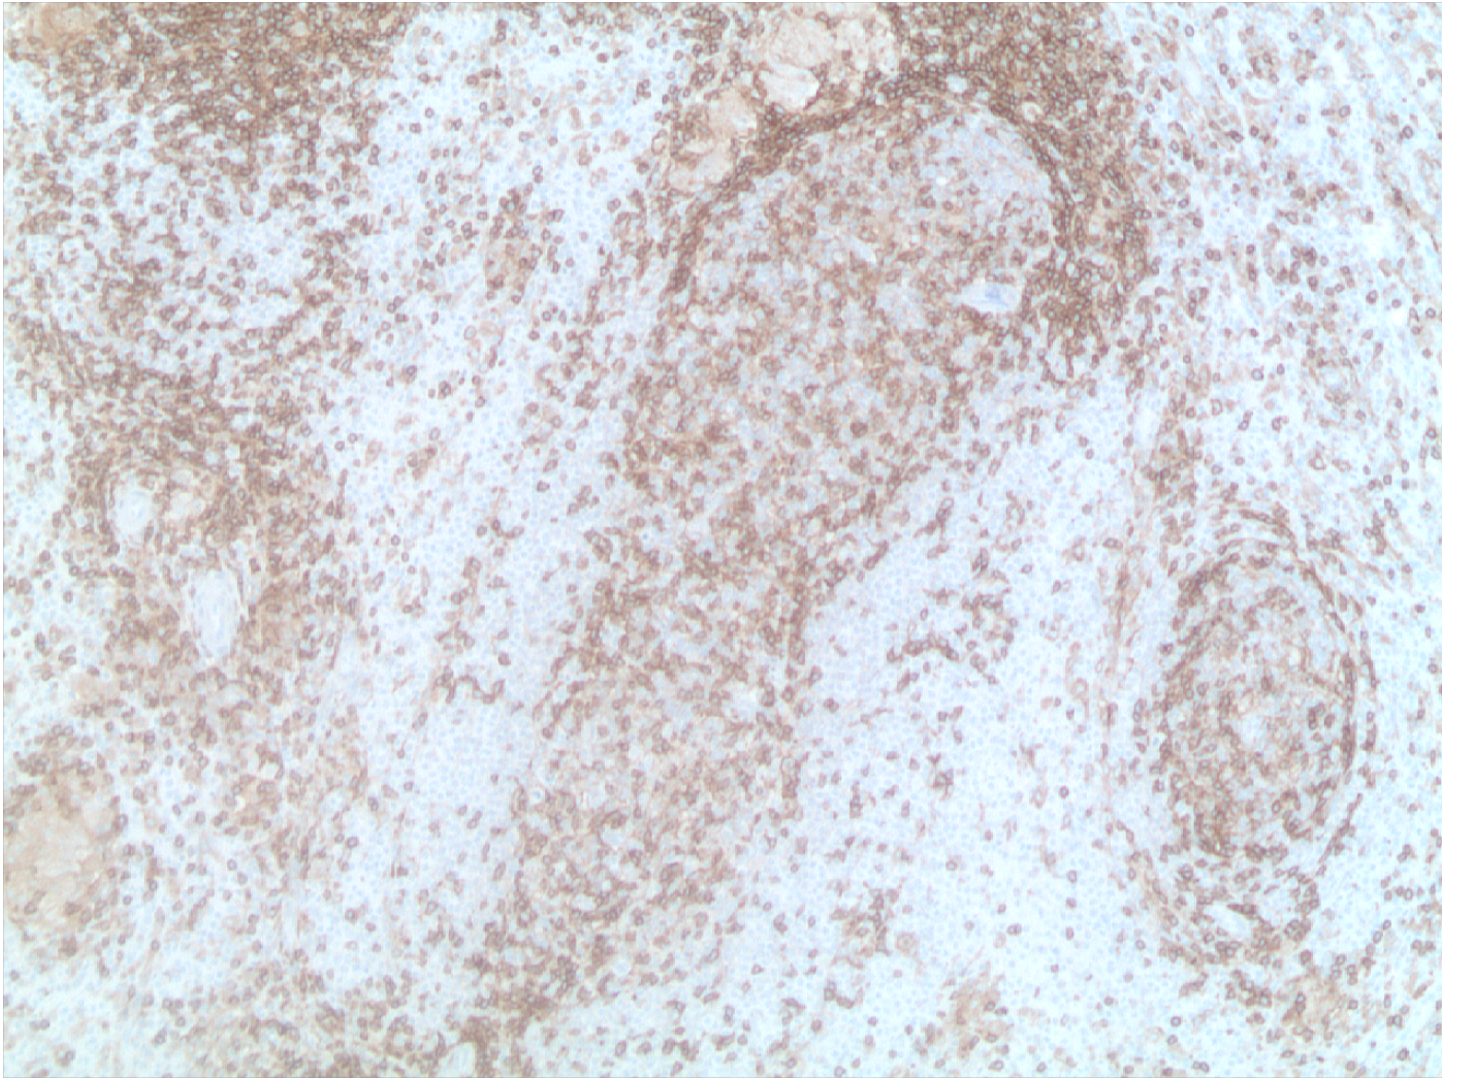

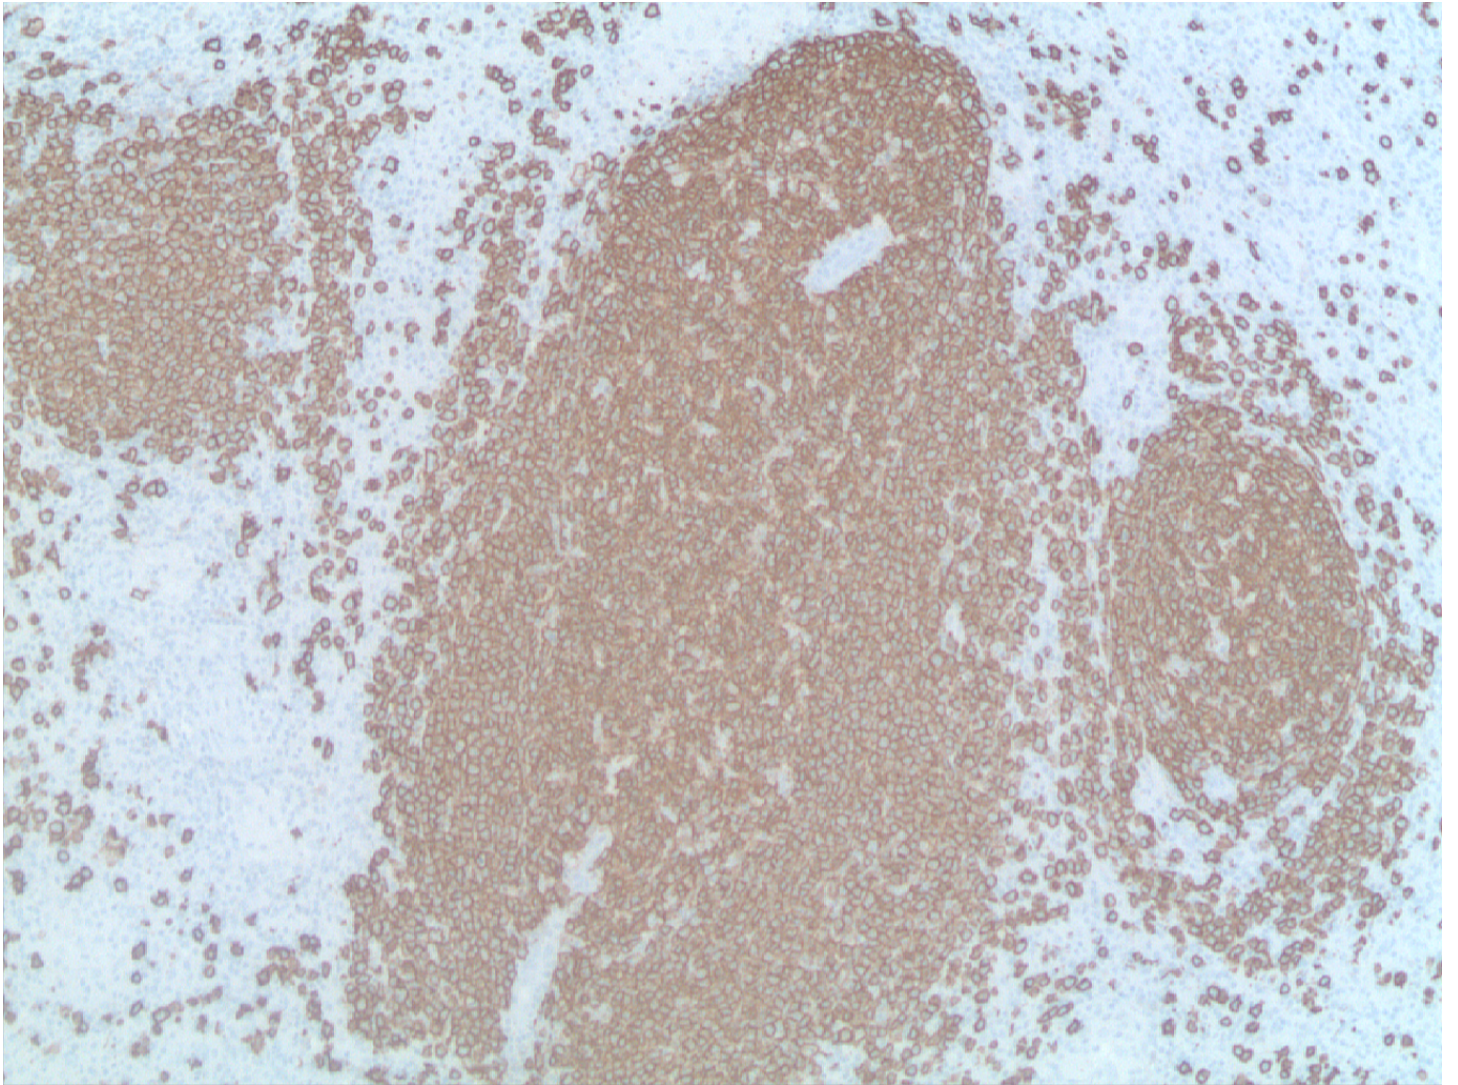

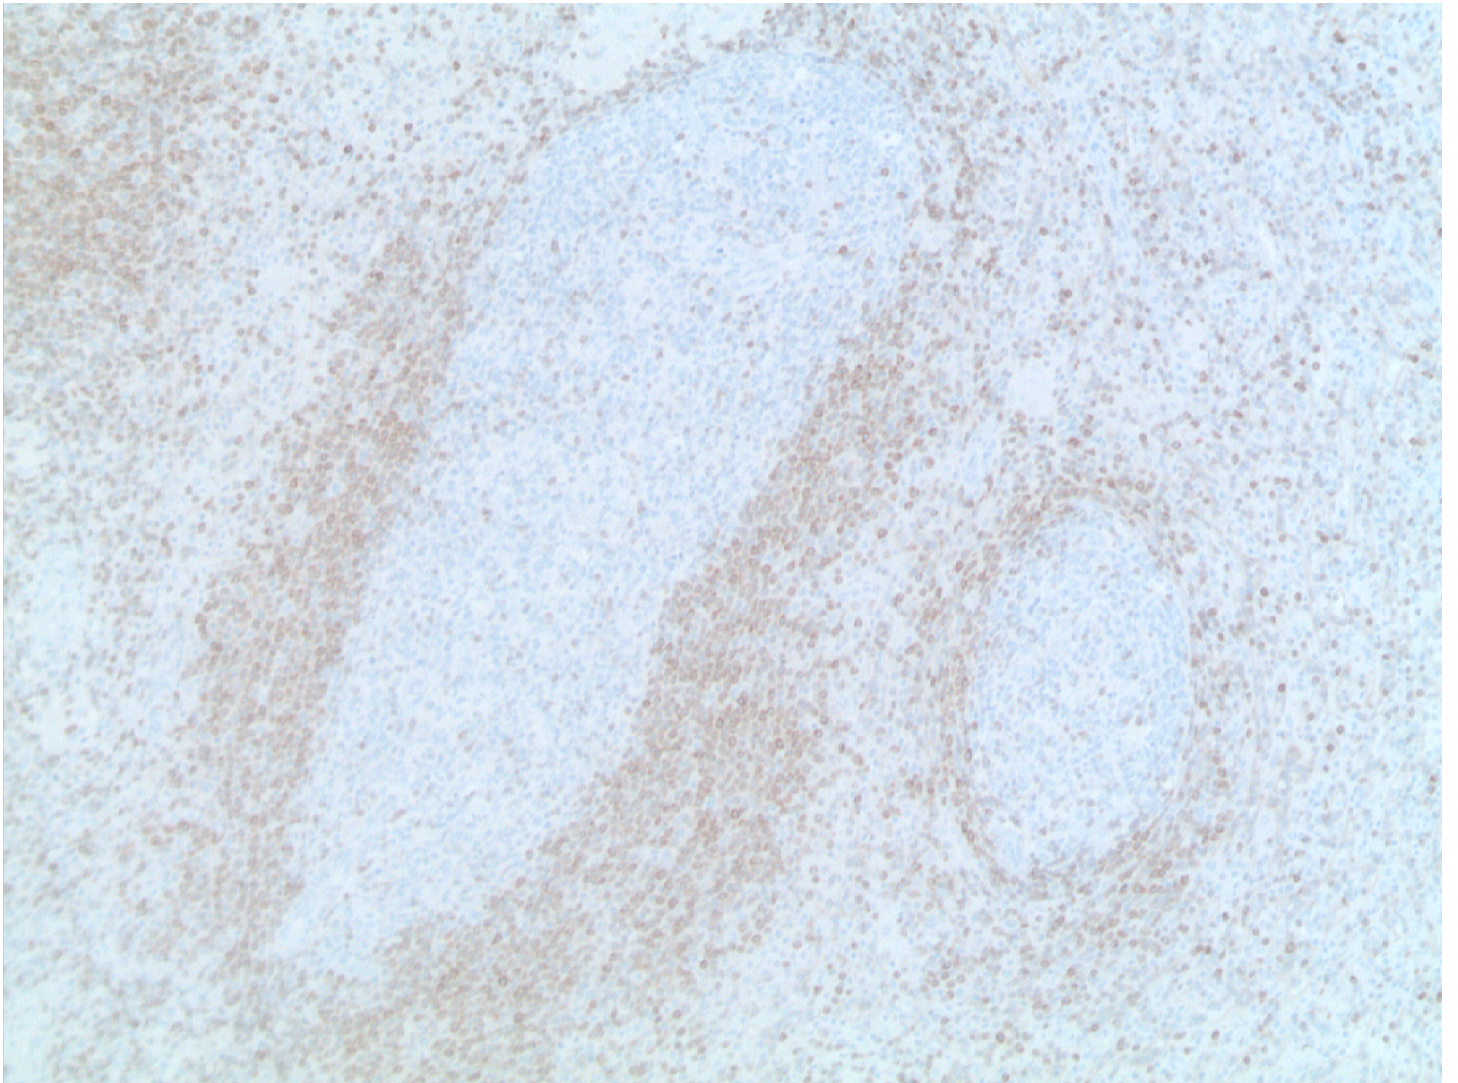

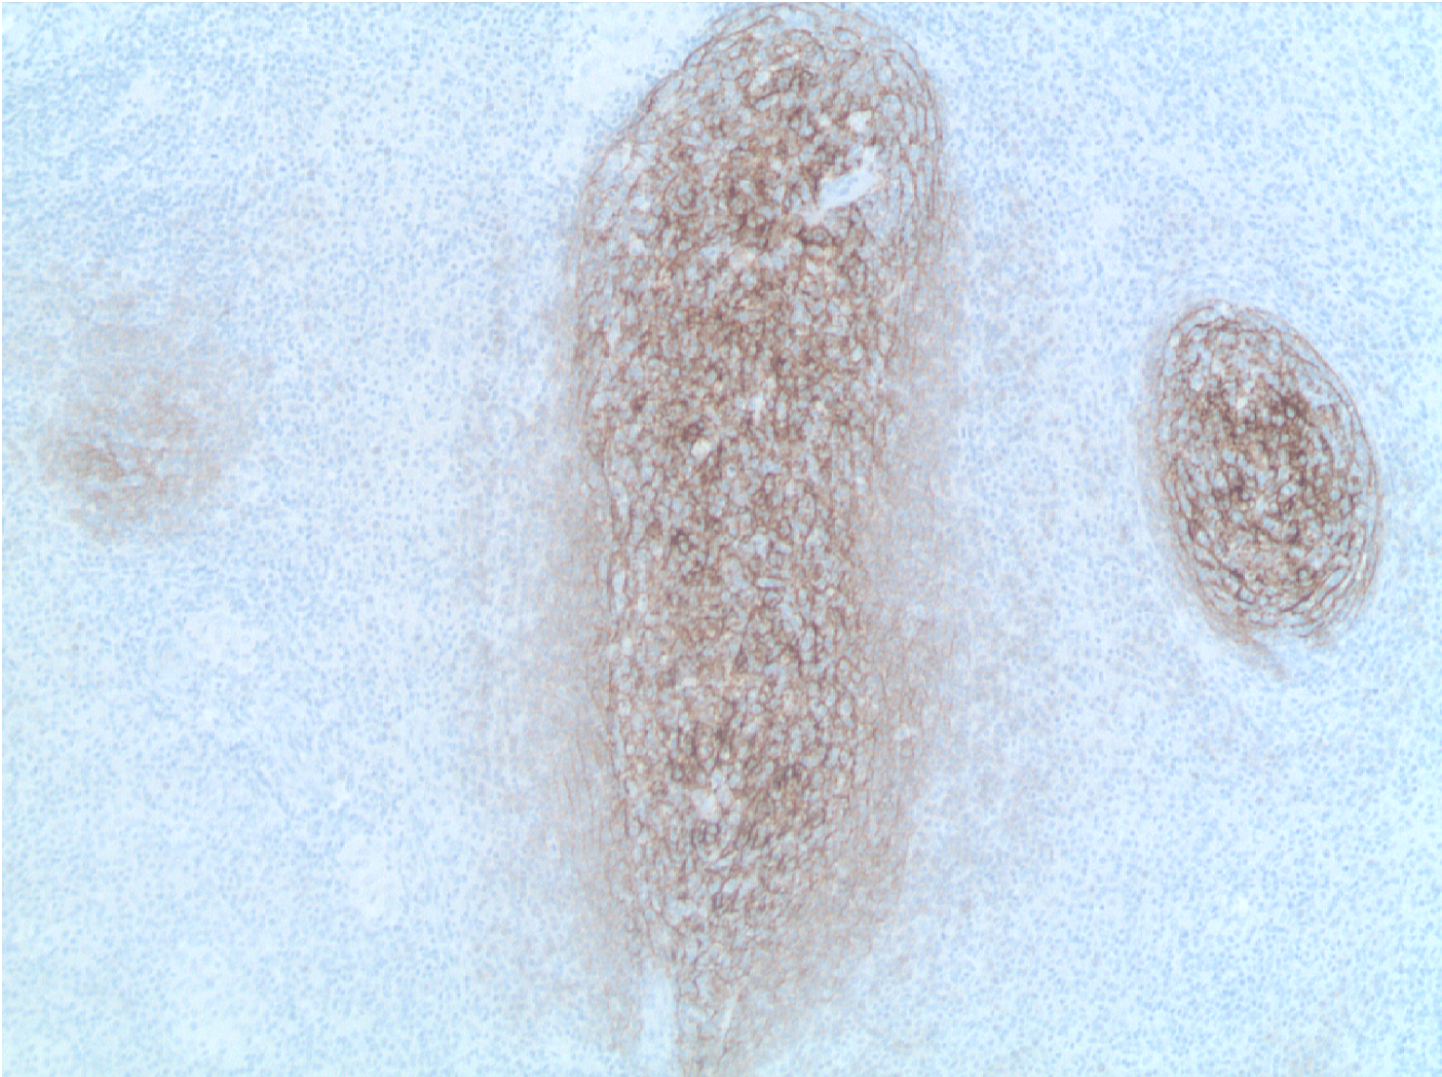

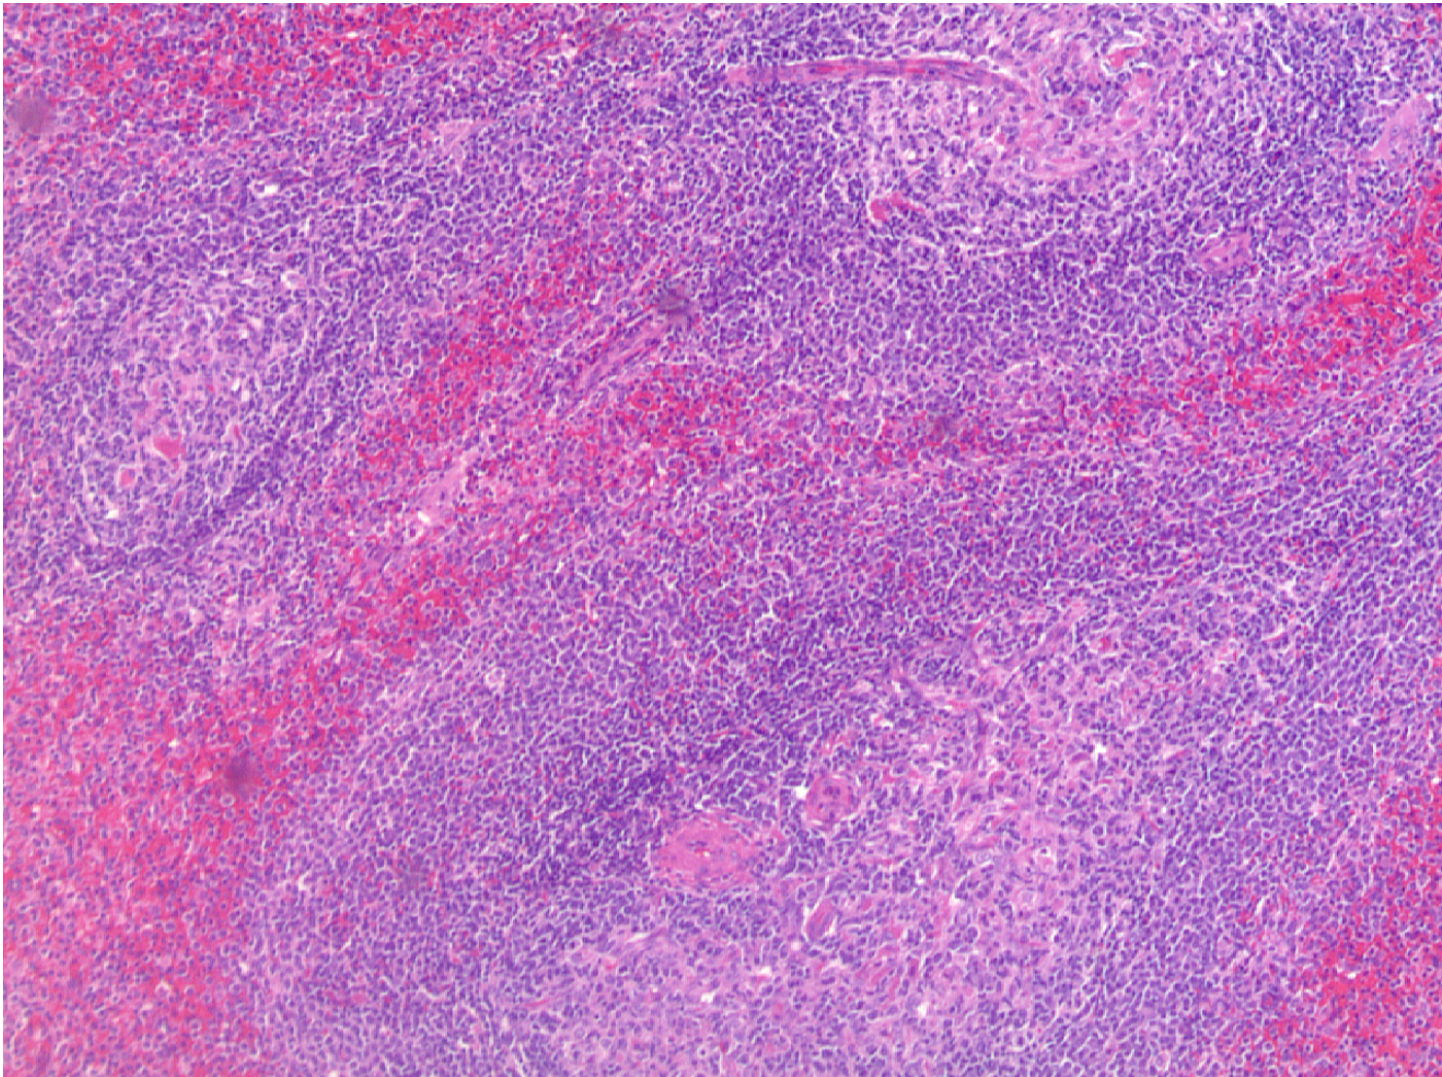

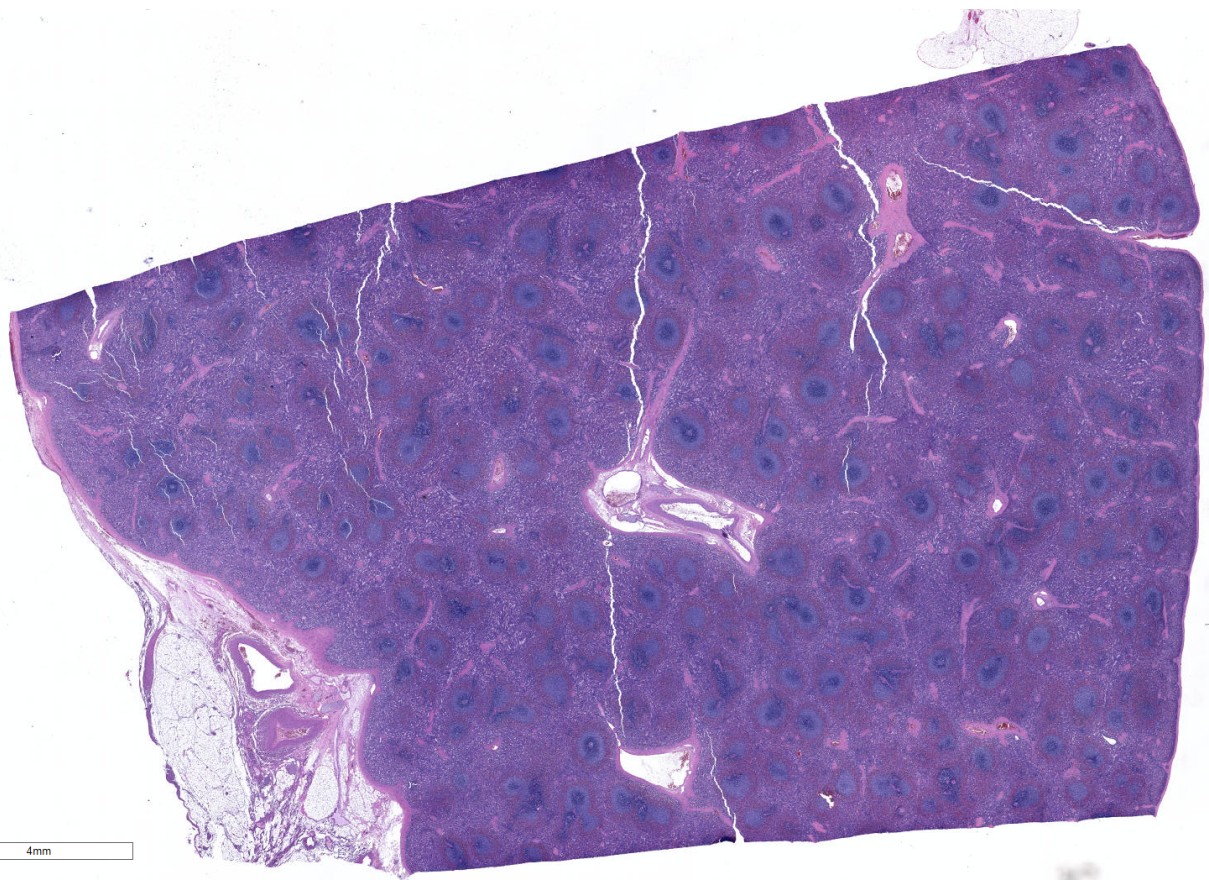

4mm

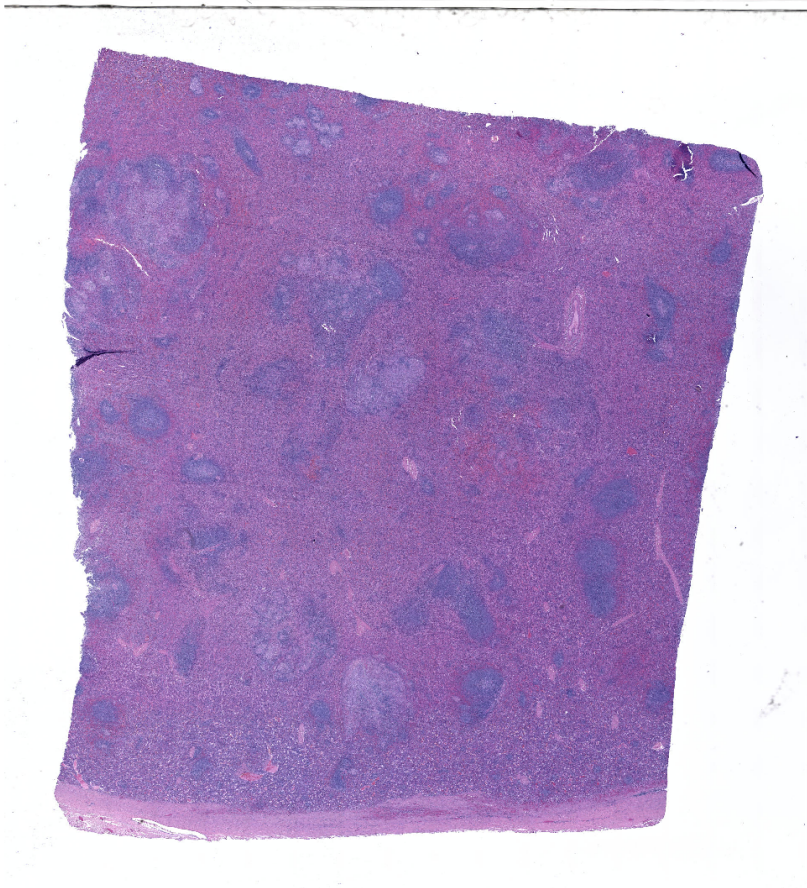

4mm



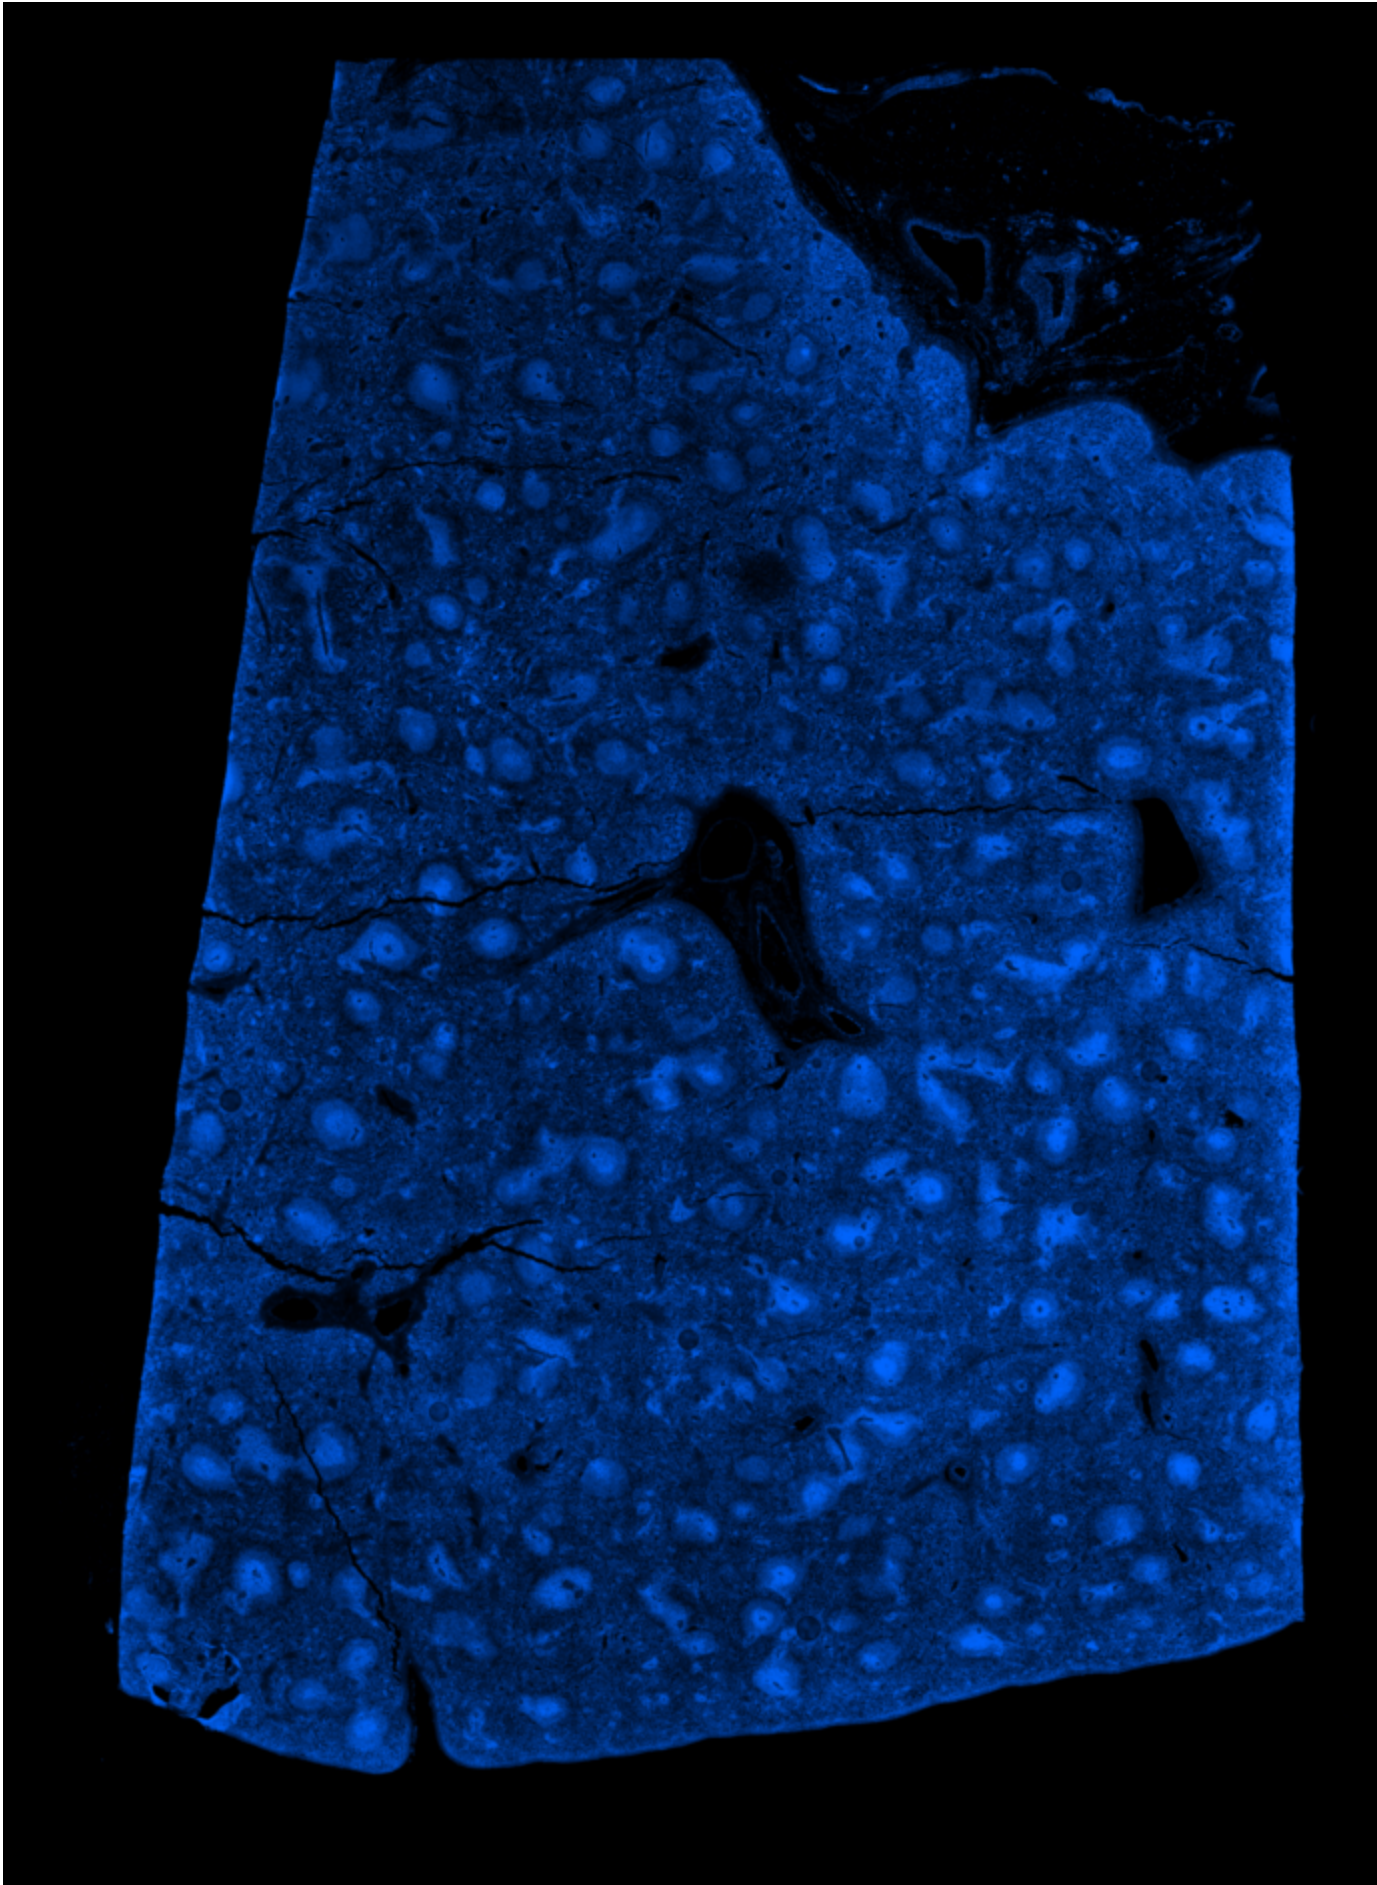

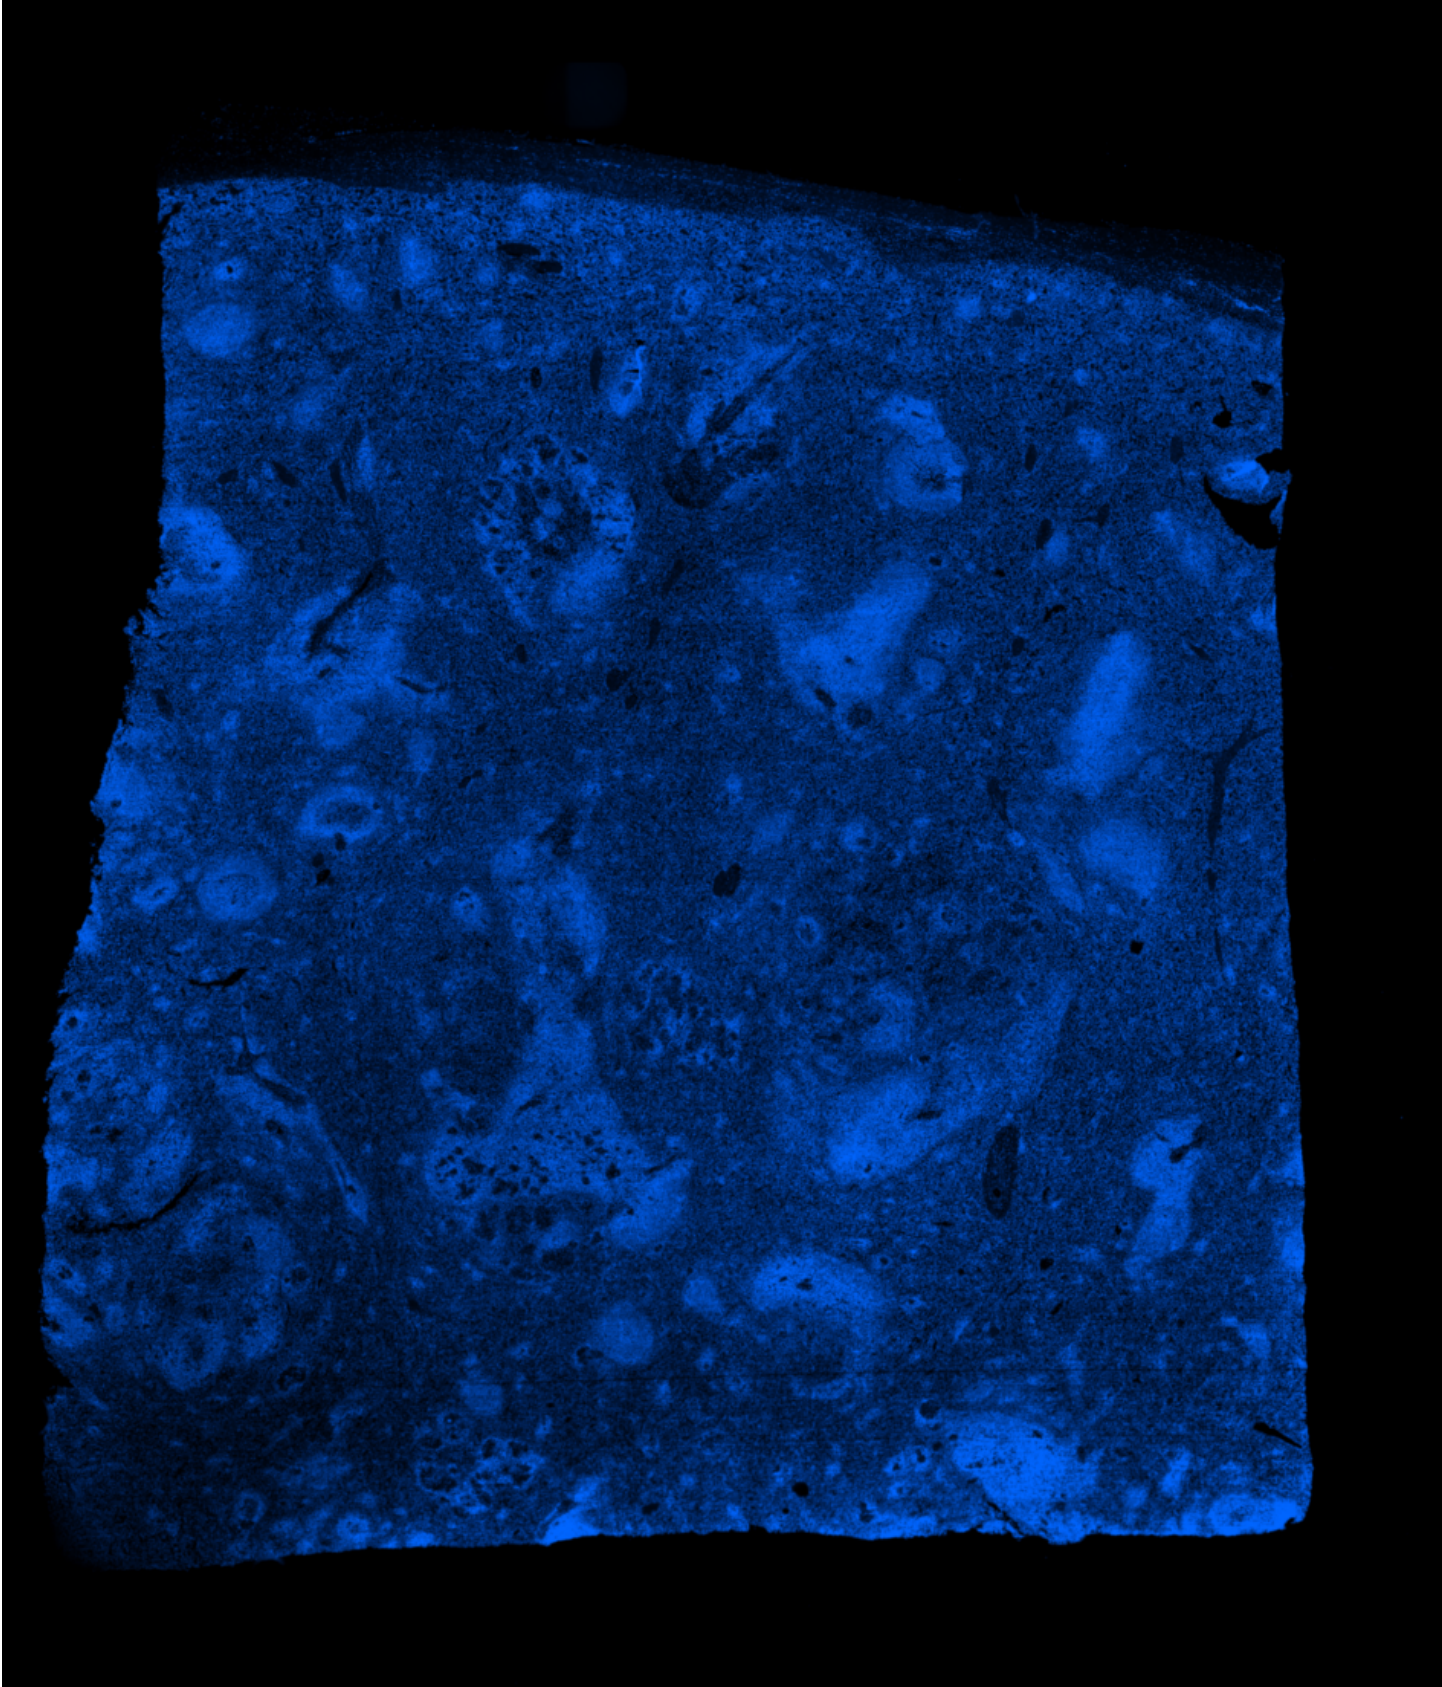

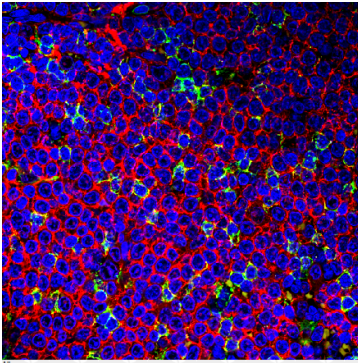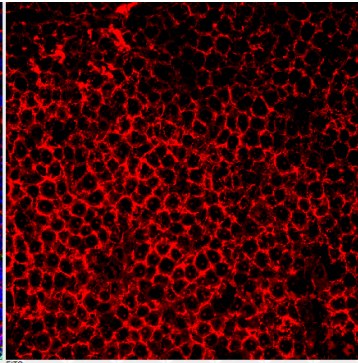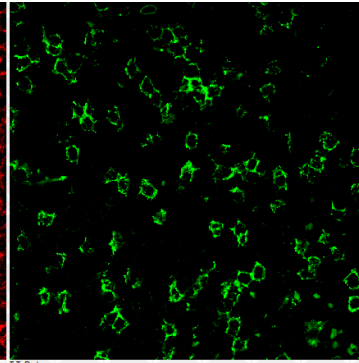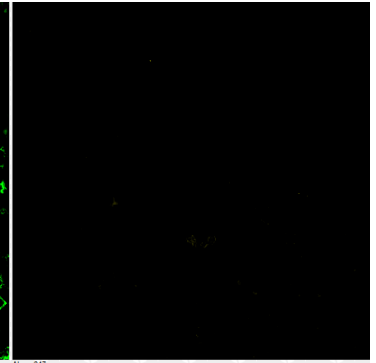

AI

FITC

T-126Red

Alexa 547

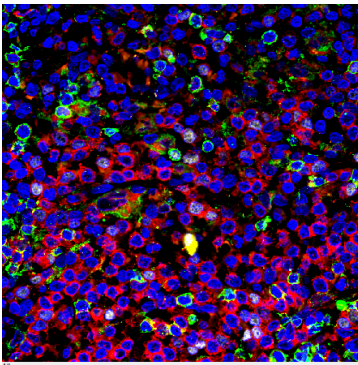

A4

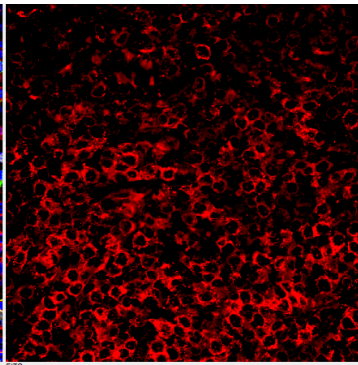

FITC

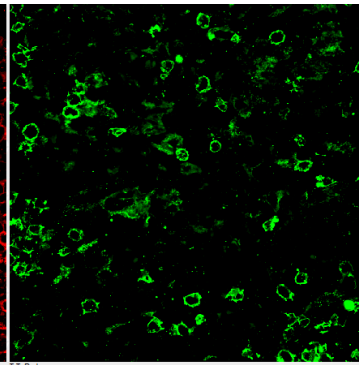

T-1024

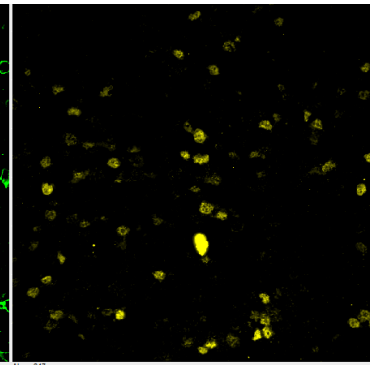

Alexa 547

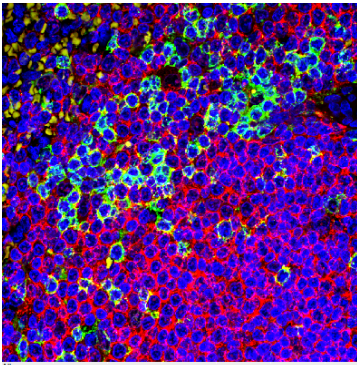

All

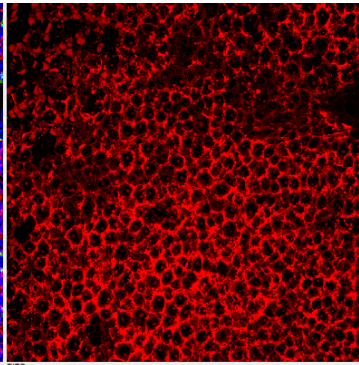

FITC

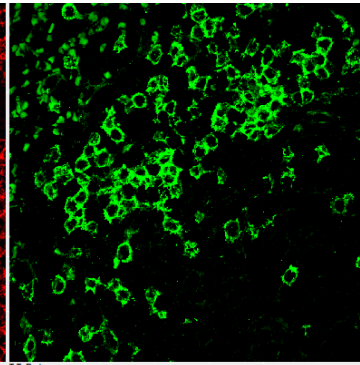

T-TagRed

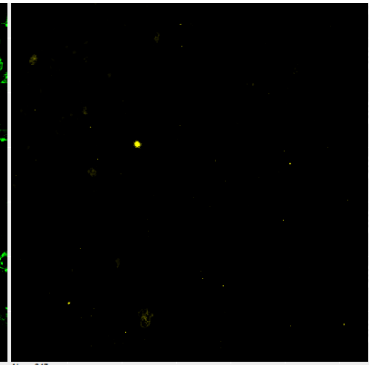

Alexa 547

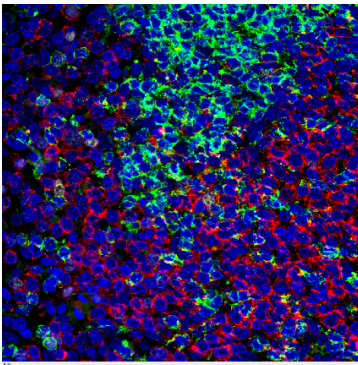

Ab

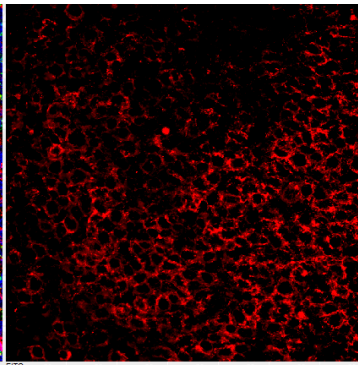

FITC

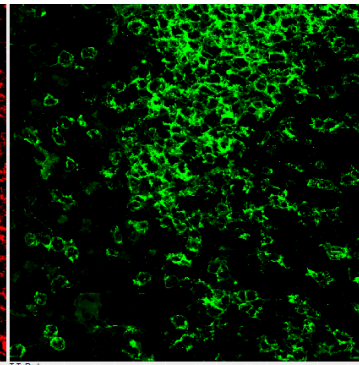

T-12Red

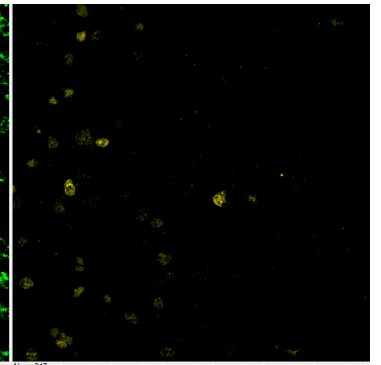

Alexa 547

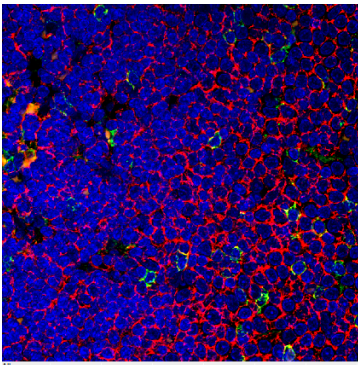

Ab

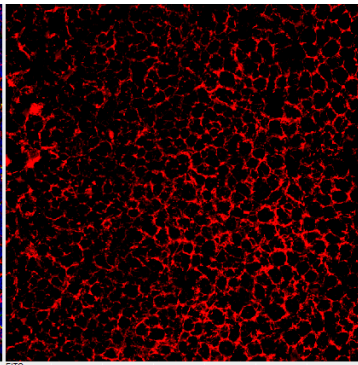

FITC

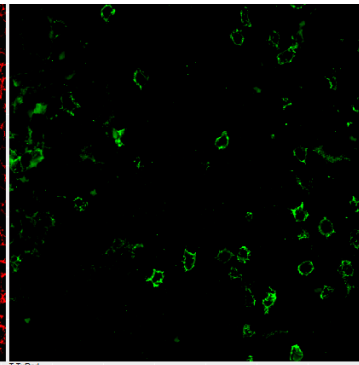

T-12Red

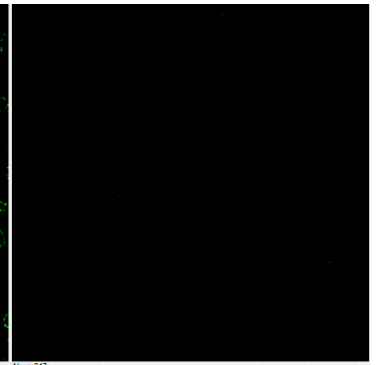

Alexa 547

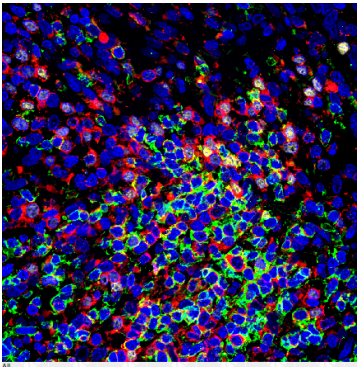

All

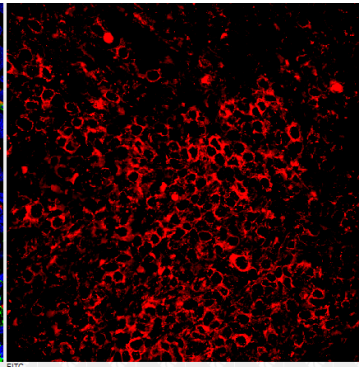

FITC

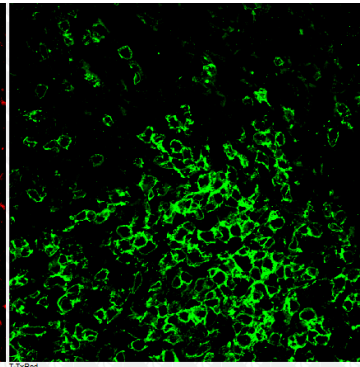

T-HxRed

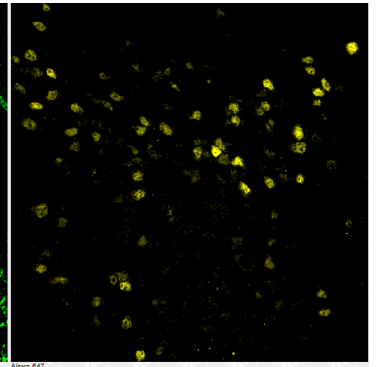

Alexa 647



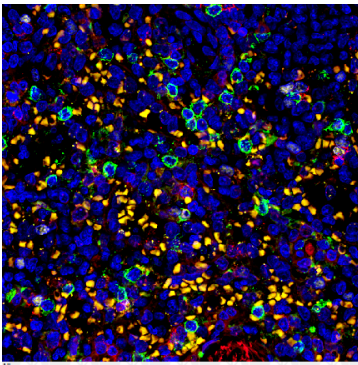

All

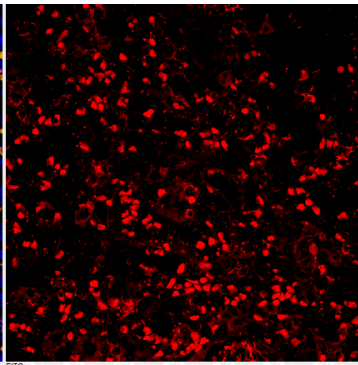

FITC

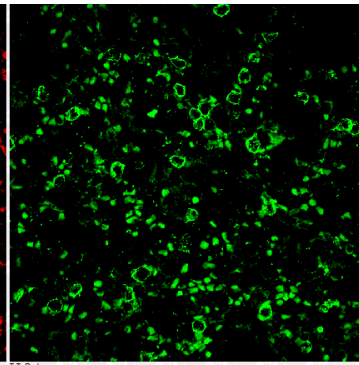

T-10Red

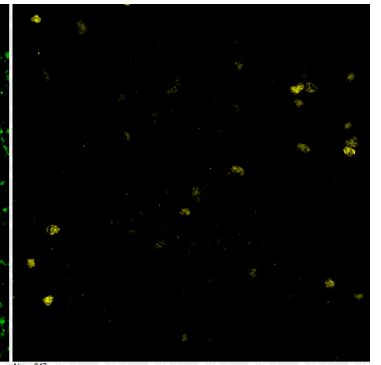

Alexa 547

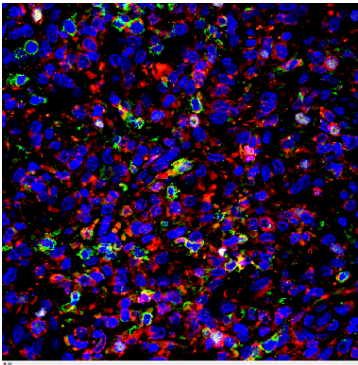

All

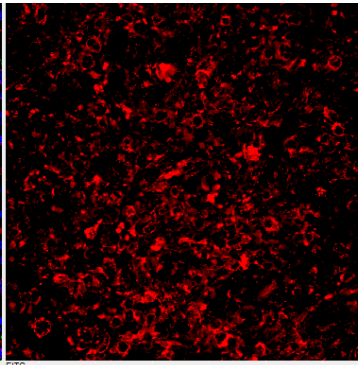

FITC

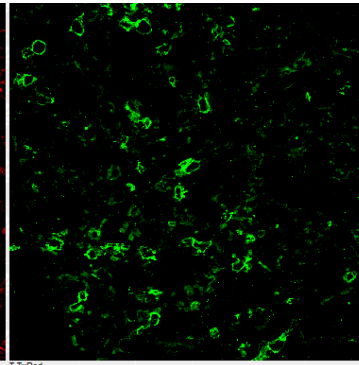

T-IRed

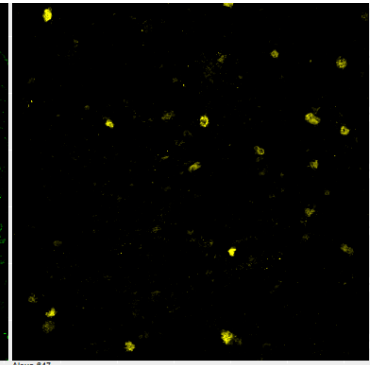

Alexa 547

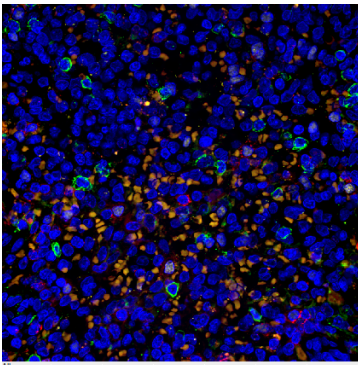

DAPI

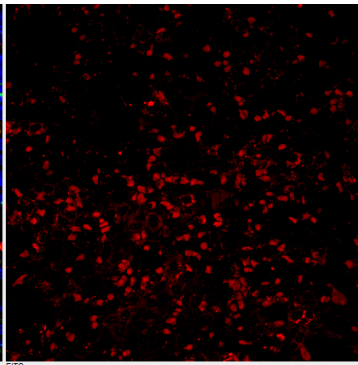

FITC

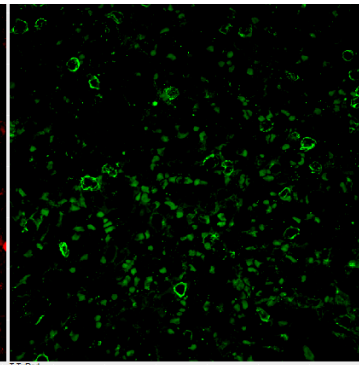

T-12Red

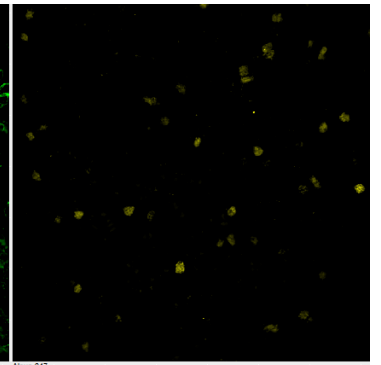

Alexa 547

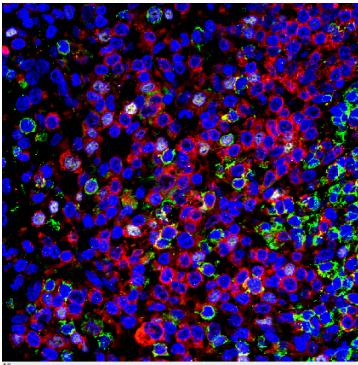

All

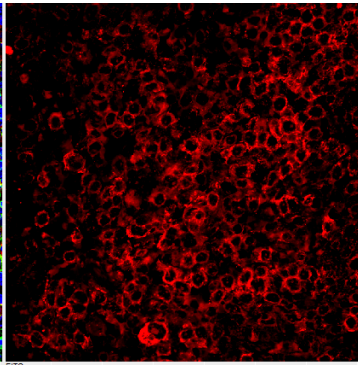

FITC

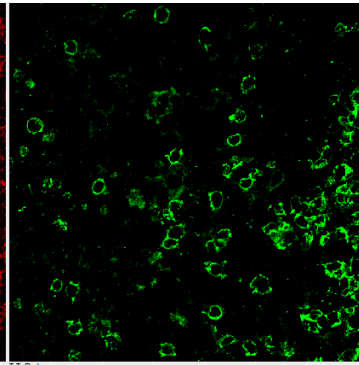

T-10Red

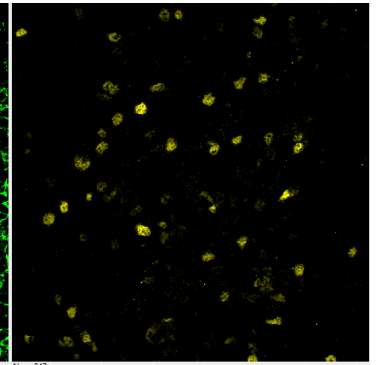

Alexa 547

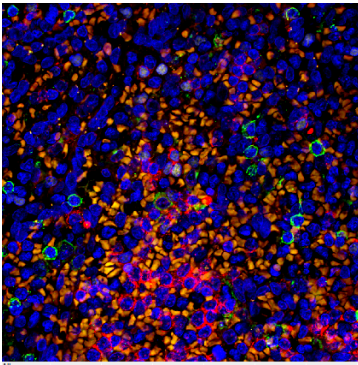

All

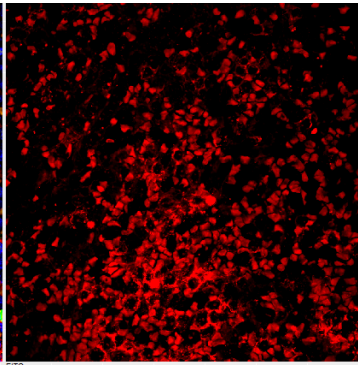

FITC

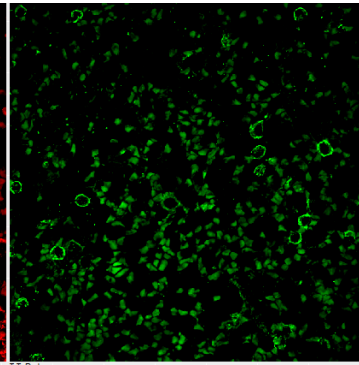

T-126Red

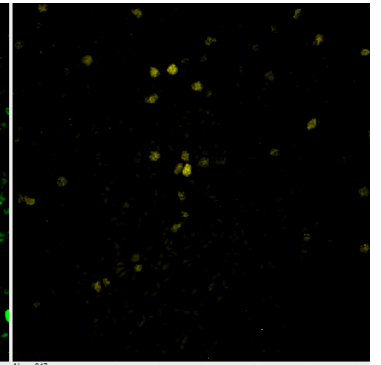

Alexa 547

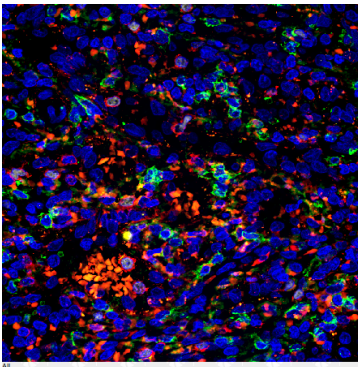

All

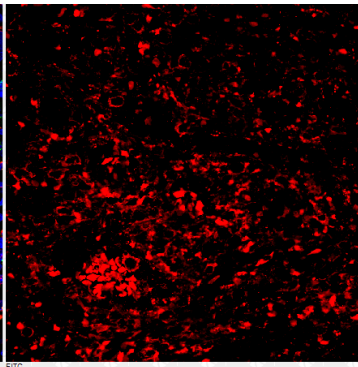

FITC

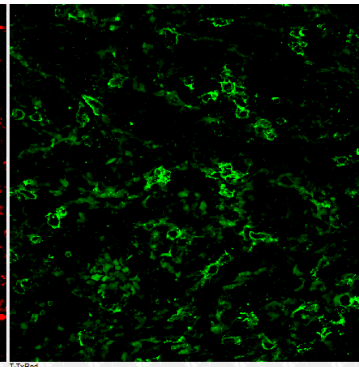

T-1xRed

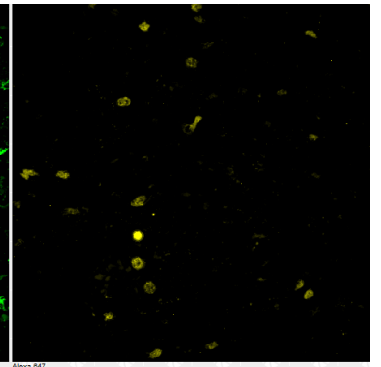

Alexa 547
